1 **Loss of Zfp335 triggers cGAS/STING-dependent apoptosis of post- $\beta$  selection**  
2 **pre-T cells**

3 Jeremy J Ratiu<sup>1\*</sup>, William Barclay<sup>1</sup>, Qun Wang<sup>1</sup>, Naren Mehta<sup>1</sup>, Melissa J Harnois<sup>1</sup>,  
4 Devon DiPalma<sup>1</sup>, Sebastian Wellford<sup>1</sup>, Sumedha Roy<sup>1</sup>, Alejandra V Contreras<sup>2</sup>, David  
5 Wiest<sup>2</sup>, Yuan Zhuang<sup>1</sup>

6 <sup>1</sup> Duke University, Department of Immunology, Durham, NC 27710

7 <sup>2</sup> Fox Chase Cancer Center, Blood Cell Development and Function Program,  
8 Philadelphia, PA 19111

9 \* Correspondence: [Jeremy.Ratiu@duke.edu](mailto:Jeremy.Ratiu@duke.edu)

10

11 **Abstract**

12 Production of a diverse peripheral T cell compartment requires massive  
13 expansion of the bone marrow progenitors that seed the thymus. There are two main  
14 phases of expansion during T cell development, following T lineage commitment at the  
15 DN2 stage and following successful rearrangement and selection for functional TCR $\beta$   
16 chains in DN3 thymocytes, which promotes development of DN4 cells to the DP stage.  
17 Signals driving expansion of DN2 thymocytes are well studied, however, factors  
18 regulating the proliferation and survival of DN4 cells remain poorly understood. Here,  
19 we uncover an unexpected link between the transcription factor Zfp335 and control of  
20 cGAS/STING-dependent cell death in post- $\beta$ -selection DN4 thymocytes. Zfp335 controls  
21 survival by sustaining expression of Ankle2, which suppresses cGAS/STING-dependent  
22 cell death. Together, this study identifies Zfp335 as a key transcription factor controlling

23 the survival of proliferating post- $\beta$ -selection thymocytes and demonstrates a key role for  
24 the cGAS/STING pathway driving apoptosis of developing T cells.

## 25 **Introduction**

26 Development of large number of T cells with clonally acquired T cell receptor  
27 (TCR) in the thymus demands a small number of bone marrow derived progenitors to  
28 undergo vigorous expansion prior to each of the sequentially ordered TCR gene  
29 rearrangement events. The first major expansion occurs immediately upon T lineage  
30 commitment at the DN2 stage prior to rearrangement of any TCR gene<sup>1, 2, 3, 4</sup>. The  
31 expanded T cell progenitors enter the DN3 stage where rearrangement at the TCR $\beta$ ,  $\gamma$ ,  
32  $\delta$  gene loci become permissive. In postnatal thymus, the majority of DN3 cells will  
33 choose the  $\alpha\beta$ T cell fate due to the generation of a productively rearranged TCR $\beta$  chain.  
34 Post  $\beta$ -selection DN3 cells then move to the DN4 stage where the second phase of  
35 expansion occurs, typically involving several rounds of rapid proliferation over the  
36 course of 2-3 days in mice. The expansion of TCR $\beta$  positive cells result in generation of  
37 the post mitotic DP cells, which constitutes 90% of all thymocytes in post-natal mice and  
38 humans. DP cells undergo TCR $\alpha$  gene rearrangement and selection, a process  
39 resulting in approximately 1% of cells surviving and contributing to the peripheral T cell  
40 pool. Therefore, the expansion of post  $\beta$ -selection DN4 cells prior to TCR $\alpha$  gene  
41 rearrangement and TCR selection represents a critical amplifier to control the output of  
42  $\alpha\beta$ T cells from the thymus.

43 While most stages of T cell development have been subject to extensive genetic  
44 and functional characterization, the post- $\beta$ -selection proliferative phase remains less

45 well understood. Previous studies have shown that proliferation but not survival of DN4  
46 cells is dependent upon IL-7R signaling which functions to repress Bcl6 expression<sup>5</sup>.  
47 Similarly, proliferation during this stage of development also requires the combined  
48 activities of NOTCH and pre-TCR signaling<sup>6, 7, 8, 9</sup>. This effect is in part the result of  
49 induction of Fbxl1 and Fbxl12 which induce polyubiquitination and proteasomal  
50 degradation of Cdkn1b ensuring proper cell cycle progression and proliferation<sup>10</sup>.  
51 Survival of proliferating post- $\beta$ -selection thymocytes was found to require expression of  
52 the chromatin associated protein yin yang 1 (Yy1), the absence of which drives p53-  
53 dependent apoptosis<sup>11</sup>. Animal models exploring cell death during T cell development  
54 have repeatedly shown thymocyte apoptosis, including among DN4 cells, is largely  
55 driven by activities of pro-apoptotic Bcl2 family proteins<sup>12, 13, 14, 15, 16</sup>. Pathways  
56 controlling the survival and death of early proliferating thymocytes upstream of the Bcl2  
57 family remain largely unexplored.

58 Underpinning the fate decisions of thymocytes are vast transcriptional networks  
59 which coordinate the intricate changes and checkpoint traversals required for proper  
60 development<sup>17</sup>. Numerous transcription factors function at different stages to achieve  
61 this result. One transcription factors family of particular importance are the basic helix-  
62 loop-helix E proteins, which include E2A, HEB and E2-2. In developing T cells, activities  
63 of the E2A and HEB have been shown to regulate nearly all stages of thymopoiesis<sup>18</sup>,  
64<sup>19</sup>. These E proteins play critical roles in enforcing the  $\beta$ -selection checkpoint by  
65 promoting expression of *Rag1/2*<sup>20</sup> and *pre-Ta*<sup>21</sup>, activation of the TCR $\beta$ <sup>22</sup>, TCR $\gamma$ , and  
66 TCR $\delta$  loci<sup>23</sup> and preventing passage of DN cells lacking a functional TCR $\beta$  chain from  
67 progressing to the DP stage<sup>24, 25</sup>. Additionally, E protein activity has been shown to

68 enforce early T cell lineage commitment <sup>26</sup> and promote survival of post- $\beta$ -selection DP  
69 thymocytes undergoing TCR $\alpha$  recombination <sup>27</sup>. Together, the combined activities of E  
70 proteins play critical and indispensable roles in the establishment of a functional T cell  
71 repertoire. However, due to the widespread binding of these factors throughout the  
72 genome of developing thymocytes our understanding of their roles in development are  
73 far from complete.

74         The cGAS/STING pathway functions to sense cytosolic DNA and initiate innate  
75 immune responses <sup>28</sup>. Cyclic GMP-AMP (cGAMP) synthase (cGAS) recognizes dsDNA,  
76 typically of foreign origin, catalyzing the generation of the cyclic dinucleotide (CDN)  
77 second messenger cGAMP which in turn drives STING activation and down-stream  
78 signaling <sup>29</sup>. The cGAS/STING pathway is best known for its functions in non-immune  
79 and innate immune cells such as macrophage and dendritic cells in the context of viral  
80 or bacterial infections. In these contexts, activation of the pathway typically results in the  
81 production of type I interferons and other pro-inflammatory mediators. Recent work has  
82 shown that the cGAS/STING pathway is also highly active but functionally divergent  
83 within T cells, primarily driving type I interferon-independent responses and apoptosis <sup>30</sup>,  
84 <sup>31, 32, 33</sup>. Under steady-state conditions the cGAS/STING pathway plays a minimal role in  
85 T cell development as evidenced by normal thymic T cell subset proportions and overall  
86 thymus size in cGAS or STING-deficient C57/BL6 mice <sup>32</sup>. However, it remains to be  
87 determined whether the cGAS/STING pathway plays a role in sensing and responding  
88 to cell intrinsic stresses during thymic T cell development.

89         In this study we show that loss of Zinc finger transcription factor 335 (Zfp335),  
90 triggered cGAS/STING-mediated apoptosis among proliferating DN4 cells. Zfp335 was

91 initially identified from genetic mapping of familial traits that cause a severe form of  
92 microcephaly<sup>34</sup>. Using a conditional knockout mouse model<sup>34, 35</sup> we show that loss of  
93 Zfp335 promotes cGAS/STING dependent apoptosis among proliferating post- $\beta$ -  
94 selection DN4 thymocytes, severe reduction in overall thymic cellularity and a near  
95 absence of peripheral T cells. Mechanistically, Zfp335 functions to suppress  
96 cGAS/STING activation through promoting Ankle2 expression which in turn regulates  
97 the cGAS inhibitor Baf<sup>36</sup>. The importance of cGAS/STING pathway among DN4  
98 thymocytes was further demonstrated by their sensitivity to STING agonist and STING-  
99 mediated cell death in wild type mice. Thus, we have uncovered for the first time a role  
100 for the cGAS/STING pathway in regulating thymic T cell development and identify the  
101 Zfp335/Ankle2/Baf axis as the first transcriptional network functioning to regulate  
102 cGAS/STING activity.

103

## 104 **Results**

### 105 Zfp335, an E-protein target, is critical for T cell development

106 The E protein family of transcription factors are indispensable regulators of nearly  
107 every stage of T cell development<sup>4, 17, 22, 24, 27, 37, 38, 39, 40</sup>. E proteins control complex  
108 transcriptional networks which remain incompletely understood. To gain deeper insight  
109 into mechanisms by which E proteins regulate T cell development, we previously  
110 performed E2A ChIP-seq to identify the genome-wide binding sites during T cell  
111 development<sup>40</sup>. We identified Zfp335 as an E protein target during T cell development  
112 (Fig S1A). Analysis of published data showed E protein-deficient thymocytes exhibit

113 significantly reduced *Zfp335* expression (Fig S1B)<sup>39</sup>. Since germline deletion of *Zfp335*  
114 is non-viable<sup>34</sup> we utilized a conditional deletion model driven in which Cre expression is  
115 controlled by the E8<sub>III</sub> enhancer of *Cd8a* (E8<sub>III</sub>-cre) to allow functional assessment of  
116 *Zfp335* in post- $\beta$ -selection thymocytes<sup>35</sup>. There are conflicting reports regarding the  
117 deletion kinetics for this Cre<sup>35, 41</sup>, therefore, we began by assessing its activity across T  
118 cell development in our system (Fig S1C-D). Consistent with Dashtsoodol *et al.*, we  
119 found E8<sub>III</sub>-cre is highly active immediately upon entry into DN3a with no recombination  
120 activity evident in the preceding DN2 stage. However, recombination does not appear to  
121 be complete until the DP stage.

122 We subsequently assessed *Zfp335*<sup>fl/fl</sup> E8<sub>III</sub>-cre (*Zfp335*cKO) mice for thymic T cell  
123 development. Deletion of *Zfp335* led to a significant reduction in total thymic cellularity  
124 (Fig 1A-B). This reduction in thymic cellularity is likely due to defects in the  $\alpha\beta$  lineage  
125 as numbers of  $\gamma\delta$  T cells were not altered (Fig 1C-D). Assessment of developmental  
126 stages revealed the reduction in thymocyte numbers of *Zfp335*cKO mice begins at the  
127 DN4 stage (Fig 1E-I).

128 Examination of the peripheral T cell compartment revealed significantly reduced  
129 numbers of splenic T cells in *Zfp335*cKO mice (Fig S2A-K). A previous study identified  
130 the hypomorphic *Zfp335*<sup>bloto</sup> allele as the causative mutation in a unique form of T  
131 lymphopenia<sup>42</sup>. Like *Zfp335*<sup>bloto</sup> mice, we found that peripheral T cells in *Zfp335*cKO  
132 mice were almost exclusively of an effector or memory phenotype suggesting these  
133 mice also exhibit a similar defect in the establishment of the naïve T cell compartment.

134 To determine the transcriptional changes resulting from loss of *Zfp335* we  
135 performed RNA-seq on *Zfp335*cKO DP thymocytes. DP cells were used as they were

136 the first population exhibiting complete deletion (Fig S1D). We found that loss of Zfp335  
137 results in differential expression of 327 genes (113 down, 214 up; Fig 1K,J). Among the  
138 161 Zfp335 ChIP-seq targets identified in thymocytes<sup>42</sup>, 34 were down-regulated in  
139 Zfp335cKO mice (Fig 1K). No Zfp335 target genes were up-regulated in Zfp335cKO  
140 samples (Fig 1K) corroborating previous findings that Zfp335 primarily functions as a  
141 transcriptional activator<sup>34, 42</sup>. Consistent with transcriptomic analyses of *Zfp335<sup>bloto</sup>*  
142 mice<sup>42</sup>, gene set enrichment analysis (GSEA) revealed significant enrichment among  
143 type I and type III interferon signaling and P53 signaling pathways in Zfp335cKO DP  
144 cells (Fig 1L). Together, these findings identify Zfp335 as a key transcription factor  
145 regulating T cell development.

#### 146 Loss of Zfp335 in DN3 thymocytes does not impair $\beta$ -selection

147 Zfp335 deletion results in reduced cell numbers beginning at the DN4 stage,  
148 raising the possibility that the inability to rearrange the TCR $\beta$  locus could be  
149 responsible. Consequently, we assessed TCR $\beta$  rearrangement in DN3 and DN4  
150 thymocytes by intracellular staining. The frequency of icTCR $\beta^+$  cells among Zfp335cKO  
151 DN3 and DN4 subsets was comparable to that of WT (Fig S3A-C). Therefore, TCR $\beta$   
152 rearrangement and subsequent pre-TCR expression are unimpaired in Zfp335cKO  
153 mice.

154 In addition to pre-TCR expression, to successfully traverse the  $\beta$ -selection  
155 checkpoint, pre-TCR signals are required for release from cell cycle arrest, survival and  
156 progression to DP<sup>43</sup>. CD27 surface expression is increased by pre-TCR signals in DN3  
157 thymocytes<sup>44</sup>. Zfp335cKO DN3 thymocytes exhibited CD27 upregulation comparable to  
158 that of WT (Fig S3D-E) indicating Zfp335-deficiency does not lead to impaired pre-TCR

159 signaling. Together, these results indicate that the observed reduction of DN4 cells in  
160 Zfp335cKO mice did not result from failure to produce TCR $\beta$  subunits or failure to  
161 transduce pre-TCR signals.

162

### 163 Zfp335 inhibits apoptosis during the DN-DP transition

164 Zfp335 deletion during the DN3 stage leads to severe defects in T cell  
165 development, likely during the post- $\beta$ -selection proliferative phase. To determine if  
166 Zfp335-deficiency altered either the proliferation or survival of post- $\beta$ -selection  
167 thymocytes, we directly measured these events in OP9-DL1 cultures *in vitro*<sup>45</sup>.  
168 Consistent with our *ex vivo* data, Zfp335cKO cells exhibit severely impaired progression  
169 to the DP stage (Fig 2A-B). Zfp335cKO cells exhibited modestly reduced proliferation  
170 compared to controls (Fig 2C-D). In contrast, Zfp335cKO cells underwent substantially  
171 increased rates of apoptosis (Fig 2E-F). Importantly, proliferation tracking (Fig 2G) and  
172 assessment of developmental progression (Fig 2H) of apoptotic mutant cells  
173 demonstrate they have undergone cell division and largely remain DN. These data  
174 suggest that Zfp335cKO cells are dying during the post- $\beta$ -selection proliferative phase  
175 and that Zfp335 activity promotes the survival of DN4 thymocytes.

176

### 177 Ectopic Bcl2 expression rescues the developmental defect resulting from loss of Zfp335

178 Our RNA-seq studies revealed Zfp335cKO thymocytes exhibit increased  
179 expression of the pro-apoptotic Bcl2-family members, PUMA (*Bbc3*), NOXA (*Pmaip1*)  
180 and *Bax* (Fig 3A), suggesting that these factors may be responsible for the observed



181 increase in apoptosis among Zfp335cKO thymocytes. The function of these proteins  
182 can be antagonized by ectopic expression Bcl2. Thus, we asked whether Bcl2  
183 overexpression could rescue Zfp335cKO thymocyte apoptosis. WT or Zfp335cKO  
184 DN3/4 thymocytes were transduced with control or Bcl2-expressing retroviruses then  
185 grown in the OP9-DL1 culture system. Bcl2 overexpression significantly reduced  
186 apoptosis in Zfp335cKO cells, indicating the induction of pro-apoptotic Bcl2 family  
187 members was at least partially responsible for the observed increase in apoptosis in  
188 Zfp335-deficient thymocytes (Fig 3B-C).

189 We next sought to test the ability of Bcl2 overexpression to rescue Zfp335-  
190 deficient cells from apoptosis *in vivo* through generating Bcl2 conditional transgenic  
191 mice (Fig 3D). Intracellular staining revealed that *Zfp335<sup>fl/fl</sup> R26<sup>LSL-Bcl2-Tg</sup> E8<sup>III-cre</sup>*  
192 (Zfp335cKO Bcl2-Tg) thymocytes exhibited increased Bcl2 protein expression relative to  
193 WT (Fig 4E). Phenotypic analysis demonstrated that ectopic Bcl2 expression was able  
194 to fully rescue the early developmental defects observed in Zfp335-deficient mice,  
195 restoring traversal of the  $\beta$ -selection checkpoint, transition to the DP stage, and total  
196 thymic cellularity (Fig 3F-L).

197 Consistent with studies of *Zfp335<sup>bloto</sup>* mice<sup>42</sup>, Bcl2 overexpression failed to rescue  
198 the impairment in final single positive thymocyte maturation (Fig S4A-C) or peripheral T  
199 cell compartment numbers (Fig S4D-E) and effector status (Fig S4F-H). Taken together,  
200 these data suggest that the early impairment of thymocyte development following loss  
201 of Zfp335 expression is due to increased rates of DN4 apoptosis driven by pro-apoptotic  
202 Bcl2-family members. However, our *in vivo* studies also revealed an additional, Bcl2-  
203 independent late block in terminal T cell differentiation within the thymus.

204

205 Defining the ‘true’ DN4 thymocyte population at the single cell level

206 The DN4 stage of T cell development remains poorly understood and, as a  
207 result, poorly defined. DN4 cells are identified by lack of expression of identifying  
208 markers associated with any other thymocyte subset. Based on these criteria, it is  
209 possible that DN4 cells defined by marker exclusion may not be homogenous. To  
210 assess whether there is any heterogeneity in the DN4 compartment exacerbated by  
211 Zfp335-deficiency, we performed scRNA-seq of phenotypically defined DN4 cells. After  
212 quality control, libraries yielded transcriptome data for 6,537 or 5,392 high-quality cells  
213 from WT or Zfp335cKO samples, respectively.

214 We identified 10 unique cell clusters (Fig 4A-C). Five clusters were largely  
215 cycling cells (DN4\_1-5; Fig 4A-B) uniquely expressing *Ptcra* (pre-T $\alpha$ ) and proliferation  
216 associated genes (*Mki67*, *Cdk1*) (Fig 4D), representing bona fide DN4 cells. Three  
217 clusters (Mat\_1-3) expressed high levels of *Trac* and *Trbc1* transcripts (Fig 4D). Two  
218 additional clusters (gd17 and gd1) of  $\gamma\delta$  T cells were identified. gd17 cells express high  
219 levels of *Sox13*, *Rorc* and *Maf*, features of  $\gamma\delta$ 17 while gd1 express *Nkg7*, *Ii2rb*, *S1pr1*  
220 and *Ii7r* associated with cytotoxic  $\gamma\delta$  T cells (Fig 4D). Based on this clustering, Zfp335-  
221 deficiency led to substantial proportional increases and decreases in the  $\gamma\delta$  T cell  
222 clusters and Mat\_2 cluster relative to WT control, respectively (Fig 4C).

223 We were surprised to find a large proportion of phenotypically defined DN4  
224 thymocytes expressing *Trac* transcripts and sought to define these populations.  
225 Consistent with their lack of surface CD4 or CD8 these cells uniformly lacked *Cd4*,

226 *Cd8a* and *Cd8b1* transcripts (Fig 4D). We hypothesized that these cells may represent  
227 post-positive selection thymocytes that transiently down-regulated surface TCR, CD4  
228 and CD8 expression. Consistent with our hypothesis, we found these cells express high  
229 levels of *Nr4a1*, *Cd69*, *Pdcd1*, *Egr1*, *Cd2*, and *Itm2a*, signature genes of positive  
230 selection <sup>46</sup>. Based on this profile we define cells from these clusters as maturing  $\alpha\beta$  T  
231 cells.

232 Importantly, most cells associated with the maturing  $\alpha\beta$  or  $\gamma\delta$  T cell clusters were  
233 non-cycling (Fig 4B), and therefore, not ‘true’ DN4 cells. Retroviral transduction  
234 depends on cell being cycling<sup>47</sup>. Therefore, we determined whether ‘true’ DN4 cells  
235 could be separated from contaminating populations *ex vivo* with retroviruses. Virally  
236 transduced or non-transduced DN4 cells were placed in OP9-DL1 culture. Non-  
237 transduced DN4 cells preferentially give rise to single-positive cells expressing high  
238 levels of surface TCR, whereas, transduced DN4 become DP (Fig 4F-G). Since OP9-  
239 DL1 cells are unable to support positive selection, we conclude that these non-  
240 transduced DN4 cells are post-positive selection cells transitioning to SP. Together,  
241 these results demonstrate that the phenotypically defined DN4 compartment is  
242 heterogenous and establishes retroviral transduction as a method to isolate DN4 cells  
243 for *in vitro* analysis.

244

245 Ankle2 is a critical Zfp335-regulated gene required for survival of DN4 thymocytes

246 Next, we focused our scRNA-seq analyses on determining the transcriptional  
247 changes in DN4 cells resulting from loss of Zfp335. Maturing  $\alpha\beta$  and  $\gamma\delta$  cells were  
248 removed leaving only ‘true’ DN4 cells. Based on recombination kinetics (Fig S1D) not all

249 Zfp335cKO DN4 cells have undergone deletion. *Zfp335* expression could not reliably  
250 delineate mutant from non-mutant cells due to low detection rate (8% of Zfp335cKO vs  
251 17.7% of WT cells). To identify true mutant DN4 cells in our dataset, we assessed  
252 transcription factor activity using gene set scores calculated for each cell based on the  
253 expression of the Zfp335 ChIP-seq target genes down-regulated in mutant DP cells (Fig  
254 1J,K). Zfp335cKO cells exhibited a bimodal distribution for the gene set. Using  
255 established methods<sup>48</sup>, cutoff values were determined for the distribution and cells  
256 falling below this threshold were considered true mutants (Fig S5A). Cutoffs were  
257 confirmed by differential expression analysis between WT and Zfp335cKO targets high  
258 or Zfp335cKO targets low cells. Compared to WT, Zfp335cKO targets low cells  
259 exhibited differential expression of 80 genes (60 down, 20 up; Fig S4B) whereas  
260 Zfp335cKO targets high cells only exhibited differential expression of 7 genes (5 down,  
261 2 up; Fig S4C).

262 Zfp335cKO cells above the threshold were considered non-mutant, removed and  
263 the remaining cells were then reanalyzed (Fig 5A) identifying 8 unique clusters (Fig  
264 S4D). WT and mutant cells were distributed across each cluster. C1-3 were enriched for  
265 WT whereas C4 was almost entirely mutant cells (Fig S4E). Despite regression of  
266 standard cell cycle-associated genes, clustering was largely dictated by cell cycle (Fig  
267 S4F-I). We observed no differences in cell cycle phase distributions between WT and  
268 mutant (Fig S4H). Therefore, we chose to compare WT and mutant DN4 cells based on  
269 genotype. Among the 60 down-regulated genes in mutant DN4 cells, 44 are Zfp335  
270 targets by ChIP-seq (Fig 5B)<sup>42</sup>. We hypothesized that reduced expression of one or  
271 more of these genes was responsible for the increased rates of apoptosis observed in

272 mutant DN4 cells. Thus, we examined expression of the 12 Zfp335 target genes with  
273 experimental evidence demonstrating a negative regulatory role in cell death (Fig 5C-  
274 D). Four exhibited reduced expression in mutant DN4 thymocytes (Fig 5C). Examination  
275 of expression frequency identified *Ankle2* to have the greatest reduction in percent of  
276 mutant cells expression (Fig 5E).

277 *Ankle2* encodes an ER-restricted ankyrin repeat and LEM domain-containing  
278 protein<sup>49</sup>. *Ankle2* was recently identified as a critical Zfp335-regulated factor in the  
279 establishment of the naïve T cell<sup>42</sup>. Therefore, we tested whether *Ankle2*  
280 overexpression could rescue Zfp335cKO apoptosis. WT or Zfp335cKO DN3 thymocytes  
281 were transduced with EV or *Ankle2* retrovirus and cultured on OP9-DL1 cells.  
282 Importantly, *Ankle2* overexpression was able to fully rescue Zfp335-deficient  
283 thymocytes from increased rates of apoptosis (Fig 5F-G). Moreover, *Ankle2*  
284 overexpression led to significantly increased proportions of DP cells among Zfp335cKO  
285 samples (Fig 5H).

286 Next, we sought to confirm that *Ankle2* expression is directly regulated by Zfp335  
287 in pre-T cells. Analysis of published ChIP-seq data showed Zfp335 binds the proximal  
288 promoter of *Ankle2* in thymocytes (Fig 5I). To examine the relationship between *Zfp335*  
289 and *Ankle2* expression we utilize the DN4-like mouse thymocyte cell line *Scid.adh.2c2*<sup>50</sup>  
290 for CRISPR-based transcriptional inhibition (CRISPRi) studies<sup>51</sup>. These cells were  
291 transduced with retroviruses expressing *Zfp335* promoter-targeting gRNA and anti-  
292 GCN4scFv-sfGFP-KRAB fusion construct. *Zfp335*-targeted cells exhibited reduced  
293 *Ankle2* expression proportional to the efficiency of *Zfp335* knock-down (KD) (Fig 5J).  
294 Additionally, *Zfp335*KD resulted in increased expression of *Bax* like that observed in

295 Zfp335cKO thymocytes (Fig. 5K). Together, these results demonstrate a direct  
296 relationship between *Zfp335* and *Ankle2* expression in developing T cells and suggest  
297 reduced *Ankle2* expression resulting from loss of *Zfp335* drives DN4 apoptosis in  
298 *Zfp335cKO* mice.

299

300 Disruption of the *Zfp335*/*Ankle2*/*Baf* axis drives cGAS/STING-dependent apoptosis of  
301 DN4 thymocytes

302 Next, we sought to determine the mechanism driving this increase in cell death  
303 resulting from reduced *Ankle2* expression. *Ankle2* has previously been shown to control  
304 nuclear envelope (NE) reassembly and integrity following mitosis through regulation of  
305 Barrier to Autointegration Factor 1 (*Banf1* or *Baf*) phosphorylation. Consistent with  
306 reduced *Ankle2* expression we observed significant increases in *Baf* phosphorylation  
307 among *Zfp335cKO* DN4 thymocytes (Fig 6A-C). Additionally, as previously reported,  
308 disruption of *ANKLE2* or *BANF1* expression in Hela cells led to severe disruptions in NE  
309 architecture (Fig S6A). To determine if the same is true for *Zfp335*-deficient DN4  
310 thymocytes we examined the NE *ex vivo*. Indeed, *Zfp335cKO* DN4 thymocytes exhibit  
311 significantly altered NE architecture characterized by diffuse Lamin B1 throughout the  
312 cytosol, reduced DAPI signal possibly the result of loss of nuclear-cytosolic  
313 compartmentalization, and reduced nuclear sphericity (Fig 6D-G). Together, these data  
314 confirm that loss of *Zfp335* leads to significantly altered NE architecture consistent with  
315 dysregulation of *Ankle2*/*Baf*-mediated NE reassembly and maintenance.

316 Accumulation of cytosolic DNA or exposure of nuclear contents to the cytosol via  
317 NE disruption have been shown to activate the cGAS/STING pathway<sup>36, 52</sup>. In T cells,

318 cGAS/STING signaling generally results in anti-proliferative and pro-apoptotic effects<sup>30</sup>,  
319 <sup>31, 33, 53</sup>. Therefore, we hypothesized that NE defects resulting from disruption of the  
320 Ankle2-Banf1 pathway downstream of Zfp335 loss drives cGAS/STING activation.  
321 Consistent with this hypothesis, GSEA revealed an enrichment for genes upregulated  
322 by T cells in response to STING signaling in both our bulk DP and single-cell DN4  
323 datasets (Fig 6H,I). Additionally, we found increased IRF3 activity among mutant cells  
324 (Fig 6J). cGAS/STING-mediated death of mature T cells occur in part, due to increased  
325 expression of pro-apoptotic Bcl2 family genes<sup>31</sup>. Like our findings from bulk RNA-seq  
326 (Fig 4A), we also observed increased expression of Bbc3 (PUMA), Pmaip1 (NOXA),  
327 Bcl2l11 (Bid) and Bax among Zfp335cKO DN4 cells in our scRNA-seq dataset (Fig 6K).

328 In addition to nuclear DNA, mitochondrial DNA (mtDNA) serves as a substrate for  
329 cGAS<sup>54</sup>. mtDNA release requires mitochondrial outer membrane permeabilization  
330 resulting in mitochondrial membrane depolarization<sup>55</sup>. Examination of mitochondria  
331 showed Zfp335cKO thymocytes exhibit normal mitochondrial membrane potential and  
332 total mitochondrial mass (Fig S6B-C). Therefore, mtDNA release is unlikely to be driving  
333 cGAS/STING-mediated death following loss of Zfp335. Instead, exposure of gDNA to  
334 cytosolic cGAS resulting from disrupted nuclear envelope architecture is the most likely  
335 cause.

336 To test the contribution of cGAS/STING to increased rates of DN4 apoptosis in  
337 Zfp335cKO mice 'true' DN4 cells were isolated by EV viral transduction then placed in  
338 OP9-DL1 culture for 3 days with cGAS (RU.521)<sup>56</sup> or STING (H-151)<sup>57</sup> inhibitors.  
339 Chemical inhibition of either cGAS or STING fully rescued Zfp335cKO DN4 cells from  
340 death (Fig 6L,M). Additionally, Zfp335cKO mice receiving H-151 for 7 days exhibited

341 significantly increased numbers of total thymocytes compared to vehicle controls (Fig  
342 6N). Importantly, this increase in cellularity was primarily due to increased DP numbers  
343 (Fig 6O-R). Due to the short duration of treatment, we conclude that the increase in DP  
344 cells among H-151-treated *Zfp335*cKO mice is the result of reduced cell death during  
345 the preceding proliferative DN4 stage.

346 Next, we sought to determine the role of the *Zfp335*/*Ankle2*/*Baf* axis in  
347 suppressing the cGAS/STING-mediated apoptosis in DN4 cells. To test this, *R26<sup>LSL-Cas9</sup>*  
348 *Tcrd<sup>CreERT2</sup>* DN3/DN4 thymocytes<sup>58</sup> were transduced with retroviruses expressing  
349 *Zfp335*, *Ankle2*, or *Banf1* (encoding Baf) and *Mb21d1* (encoding cGAS) or *Tmem173*  
350 (encoding STING)-targeting gRNAs or non-targeting control gRNAs (NTG) then cultured  
351 for three days with OP9-DL1 cells in the presence of 4-hydroxytamoxifen. Consistent  
352 with conditional deletion, Cas9 targeting of *Zfp335* lead to a substantial increase in DN4  
353 apoptosis (Fig 6S). Additionally, targeting of *Ankle2* or *Banf1* similarly lead to increased  
354 DN4 apoptosis. Importantly, these increases in apoptosis were cGAS/STING-dependent  
355 (Fig 6S). Similar results were observed when Cas9 expression was controlled by *E8III-*  
356 *cre* (Fig S6D-E). Together, these results demonstrate that disruption of the  
357 *Zfp335*/*Ankle2*/*Baf* axis drives cGAS/STING-mediated apoptosis of post- $\beta$ -selection  
358 DN4 thymocytes.

359

#### 360 DN4 thymocytes are uniquely sensitive to cGAS/STING-mediated cell death

361 Finally, we sought to determine whether sensitivity to cGAS/STING-driven cell  
362 death is a unique feature of *Zfp335*cKO DN4 cells or a mechanism of the DN4 stage.  
363 DN-enriched WT thymocytes were treated with the STING agonist cridanimod (CMA)



364 overnight then assayed for apoptosis. Interestingly, we found DN4 cells are uniquely  
365 sensitive to STING-mediated apoptosis (Fig 6T-U). Additionally, viability of Zfp335cKO  
366 Bcl2-Tg thymocytes was not impacted by CMA treatment (Fig 6V) suggesting that  
367 induction of pro-apoptotic Bcl2 family members downstream of STING activation are  
368 necessary for apoptosis of DN4 thymocytes.

369 Together, these data demonstrate that activation of the cGAS/STING pathway is  
370 a major contributor to Zfp335cKO DN4 apoptosis and that WT DN4 cells are uniquely  
371 sensitive to cGAS/STING-mediated death. Altogether, our studies demonstrate that loss  
372 of Zfp335 leads to defective T cell development resulting from dysregulation of the  
373 Zfp335/Ankle2/Baf axis ultimately driving cGAS/STING-mediated DN4 cell death.

374

## 375 **Discussion**

376 In this study, we identify Zfp335 as a critical transcription factor regulating early T  
377 cell development within the thymus. Specifically, it functions to promote survival of  
378 proliferating cells following  $\beta$ -selection. Conditional deletion of Zfp335 led to severe  
379 reductions in all T cell populations beginning at the DN4 stage of development.  
380 Mechanistically, we show that reduced expression of the Zfp335-regulated gene Ankle2  
381 is responsible for increased sensitivity to cell death and disruption of the  
382 Zfp335/Ankle2/Baf pathway controlling NE architecture drives cGAS/STING-dependent  
383 DN4 apoptosis.

384 Our studies provide the first comprehensive assessment of the heterogeneity  
385 within the DN4 thymocyte compartment at the single cell level. Surprisingly,  
386 phenotypically defined DN4 cells consist of cycling cells expressing pre-T $\alpha$  which

387 represent 'true' DN4 cells and mature or maturing  $\alpha\beta$  and  $\gamma\delta$  T cells. Positive selection  
388 of DP thymocytes induces a slight, transient down-regulation of CD4 and CD8<sup>59</sup>,  
389 however, the maturing  $\alpha\beta$  cells identified in our dataset completely lack both protein and  
390 mRNA expression. The cells we identified expressing TCR $\alpha$  transcripts exhibited  
391 expression patterns consistent with positive selection<sup>46</sup> and therefore, are likely post  
392 positive-selection cells which have transiently lost surface expression of TCR, CD4 and  
393 CD8. Alternatively, these cells may have undergone positive selection without ever  
394 expressing CD4 or CD8. Regardless, these maturing cells may represent a novel  
395 developmental path within the thymus. However, more detailed studies will be needed  
396 to fully characterize these cells and determine if they represent a unique lineage or  
397 simply a rare differentiation path that can be taken by any positively selected cell.

398 Han *et al.* recently identified a hypomorph allele of *Zfp335* (*Zfp335<sup>bloto</sup>*) as the  
399 causative mutation leading to reduced total peripheral T cells and an almost complete  
400 absence of naïve T cells<sup>42</sup>. They found *Ankle2* to be a critical *Zfp335*-regulated gene  
401 controlling late stages of thymic T cell maturation. However, the mechanism by which  
402 *Ankle2* regulates maturation, and the establishment of the naïve T cell compartment  
403 remains unclear. The lack of apparent developmental defects in *Zfp335<sup>blt/blt</sup>* mice during  
404 early T cell development is likely due to their use of a hypomorph allele instead of a  
405 conditional knock out as *Zfp335<sup>blt/blt</sup>* mice exhibited normal expression of *Ankle2* during  
406 the DN4 stage.

407 We have shown that *Zfp335* is at least partially regulated by E protein activity in  
408 developing T cells. E proteins play numerous indispensable roles throughout organismal  
409 development, including T cell development<sup>4, 22, 37, 38, 39, 40, 60, 61, 62</sup>. However, due to

410 widespread binding throughout the genome, the roles for transcriptional networks  
411 established by E proteins remain incompletely understood<sup>40</sup>. Our studies identify Zfp335  
412 as a novel transcription factor downstream of E proteins critical to T cell development.

413 To date, studies of T cell-intrinsic roles for cGAS/STING pathway have largely  
414 focused on activation via synthetic STING agonists<sup>31, 33, 53</sup> or expression of constitutive  
415 gain-of-function STING mutations<sup>30</sup>. These studies have primarily focused on roles of  
416 this pathway in mature peripheral T cells. To our knowledge, this is the first report of a  
417 physiological role for cGAS/STING in T cell development. Additionally, our identification  
418 of the Zfp335/Ankle2/Baf axis as key in repression of cGAS is the first transcriptional  
419 pathway identified which functions to prevent cGAS activation by self-DNA.

420 Baf was recently identified as a key inhibitor of cGAS sensing of self-DNA  
421 through competitive binding<sup>36</sup>. The ability of Baf to bind DNA is dependent upon its  
422 dephosphorylation which has been shown to be controlled by Ankle2 during mitotic  
423 exit<sup>49</sup>. Therefore, we propose the following mechanism by which loss of Zfp335 drives  
424 cGAS/STING-mediated apoptosis of DN4 thymocytes. Loss of Zfp335 results in  
425 impaired Ankle2 expression which in turn leads to the failure of Baf dephosphorylation  
426 during division. Baf hyperphosphorylation leads to improper NE reassembly and can  
427 drive spontaneous NE rupture exposing nuclear DNA to the cytosol allowing  
428 unrestricted cGAS activation and STING-mediated apoptosis.

429 Interestingly, in humans, ANKLE2 is a target of Zika virus protein NS4A which  
430 antagonizes its activity ultimately leading to microcephaly<sup>63</sup>. Humans carrying  
431 homozygous or compound heterozygous mutations in either ZNF335 or ANKLE2 exhibit  
432 severe microcephaly like that characteristic of Zika patients<sup>34, 64</sup>. Recent studies have

433 demonstrated a critical role for central nervous system immune cells in regulating  
434 neuronal stem cell maintenance and differentiation. Specifically, microglia play a key  
435 role in this process<sup>65, 66, 67</sup>. Under conditions which stimulate cGAS activity, microglia  
436 and other CNS immune cells preferentially undergo apoptosis<sup>68</sup>. Based on the  
437 mechanism revealed in this study it is possible that microcephaly resulting from Zika  
438 infection or loss of ZNF335 or ANKLE2 may be driven by cGAS/STING-dependent  
439 apoptosis of neuronal progenitors and/ or CNS immune cells. Should our mechanism  
440 extend to neuronal progenitors or CNS immune cells it may be possible to  
441 pharmaceutically prevent microcephaly in these specific instances by inhibition of the  
442 cGAS/STING pathway. However, further research will be required to determine the  
443 viability of such a therapeutic approach.

#### 444 **Acknowledgements**

445 This study was funded by the NIH (R01-GM059638 and P01-AI102853) to YZ and (P01-  
446 AI102853) to DW.

447 We thank M. Cook, N. Martin, B. Li and L. Martinek (Duke University Cancer Institute  
448 Flow Cytometry Core) for technical support and cell sorting. We thank the Duke  
449 Molecular Physiology Institute for preparation of scRNA-seq libraries. We thank M.  
450 Krangel, QJ Li, J. Racine, D. Serreze, and M. Hasham for critical reading and  
451 comments on the manuscript. We thank M. Ciofani and J. Park for providing cell lines  
452 and mice. We thank M. Parker and J. Wheaton of M. Ciofani's lab for providing MSCV-  
453 Thy1.1 and MSCV-sgRNA expression vectors.

#### 454 **Author Contributions**

455 JJR, YZ and DW designed experiments and analyzed and interpreted data. JJR, QW,  
456 NM, DD, MJH, SW, SR and AVC performed experiments. JJR, YZ and DW wrote the  
457 manuscript with editing by the co-authors. JJR and YZ oversaw and supervised all  
458 aspects of the study.

#### 459 **Declaration of interests**

460 The authors declare no competing interests.

461

#### 462 **Figures**

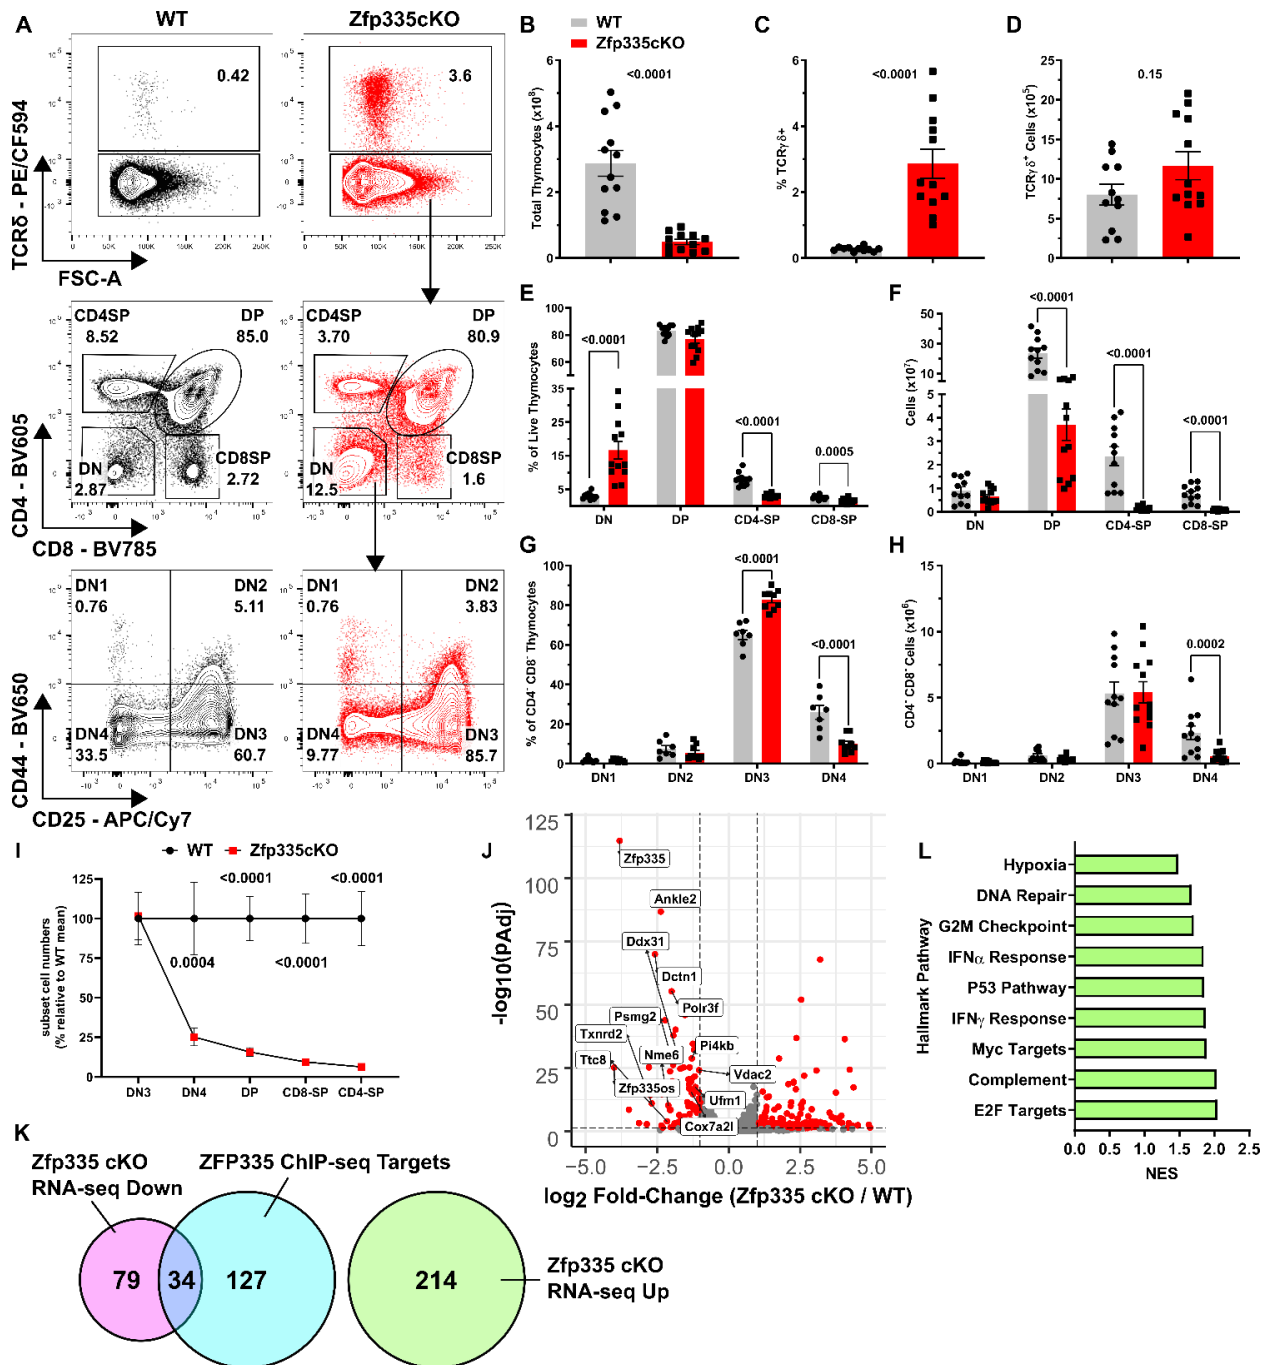

463

464 **Figure 1 – Zfp335 is critical to  $\alpha\beta$  T cell development.** (A) Gating schema for *ex vivo* analysis  
 465 thymocyte development beginning with live thymocytes (DAPI $^-$  CD90.2 $^+$ , gating not shown). (B)  
 466 Total thymic cellularity in WT (Cre-negative) or *Zfp335<sup>fl/fl</sup> E8III-cre* (Zfp335cKO) mice. Total  
 467 numbers (C) and frequency (D) of TCR $\gamma\delta^+$  cells in WT or Zfp335cKO thymuses. Numbers (E)  
 468 and frequencies (F) of DN, DP, and SP thymocyte subsets in WT or Zfp335cKO thymuses.  
 469 Numbers (G) and frequencies (H) of early DN1-DN4 thymocyte subsets in WT or Zfp335cKO  
 470 thymuses. (I) Relative cells numbers in DN3-SP thymocyte subsets represented as percent of  
 471 WT mean. (J) Differential expression of select Zfp335-target genes by RNA-seq. (K) Overlap  
 472 between Zfp335 ChIP-seq (GSE58293) and differentially expressed genes in Zfp335cKO and

473 WT DP. (L) Gene Set Enrichment Analysis of differentially expressed genes (K). Positive  
474 enrichment scores indicate pathways positively enriched in Zfp335cKO cells. (A-K) Cre-negative  
475 WT (n=11) and Zfp335cKO (n=12) 4-5-week-old male and female mice from four independent  
476 experiments. *P*-values determined by Two-way ANOVA with *post hoc* Sidak test. (I-K) RNA-seq  
477 analysis of *Zfp335<sup>+/+</sup> E8<sub>III</sub>-cre* or Zfp335cKO DP thymocytes (n=3 each) of 6-week-old female  
478 mice from one experiment. Plots show mean  $\pm$  sem.

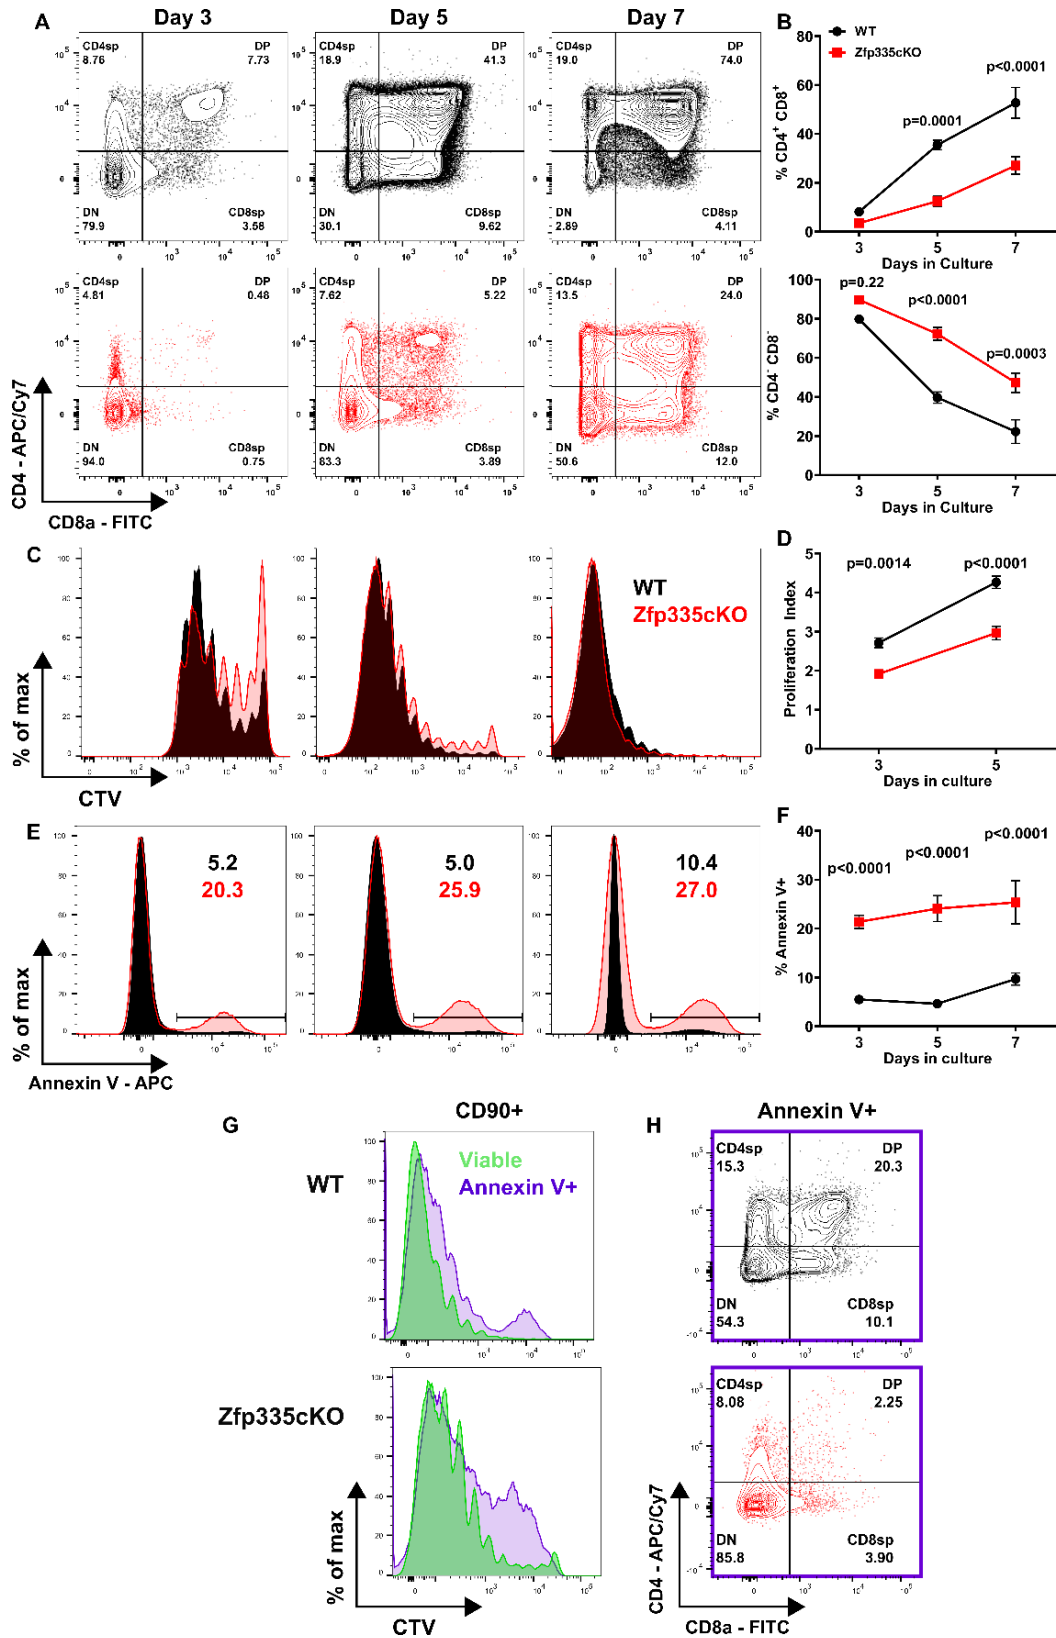

479

480 **Figure 2 - Zfp335cKO DN4 thymocytes undergo increased rates of apoptosis. (A-B)**  
 481 Assessment of developmental progression throughout OP9-DL1 culture. Proliferation



482 assessment (C-D) by Cell Trace Violet (CTV) dilution and apoptosis analysis (E-F) based on  
483 Annexin V binding at day3, 5 or 7 of culture. (G) Representative comparison of CTV dilution  
484 between Annexin V<sup>+</sup> and viable (DAPI<sup>-</sup> Annexin V<sup>-</sup>) cells on day 5 of culture. Representative  
485 CD4 vs CD8 expression among Annexin V<sup>+</sup> cells on day 5 of culture. n=6 WT or n=5  
486 Zfp335cKO from three independent experiments. *P*-values determined using Two-way  
487 Repeated Measures ANOVA with *post hoc* Sidak Test. Plots show mean  $\pm$  sem.

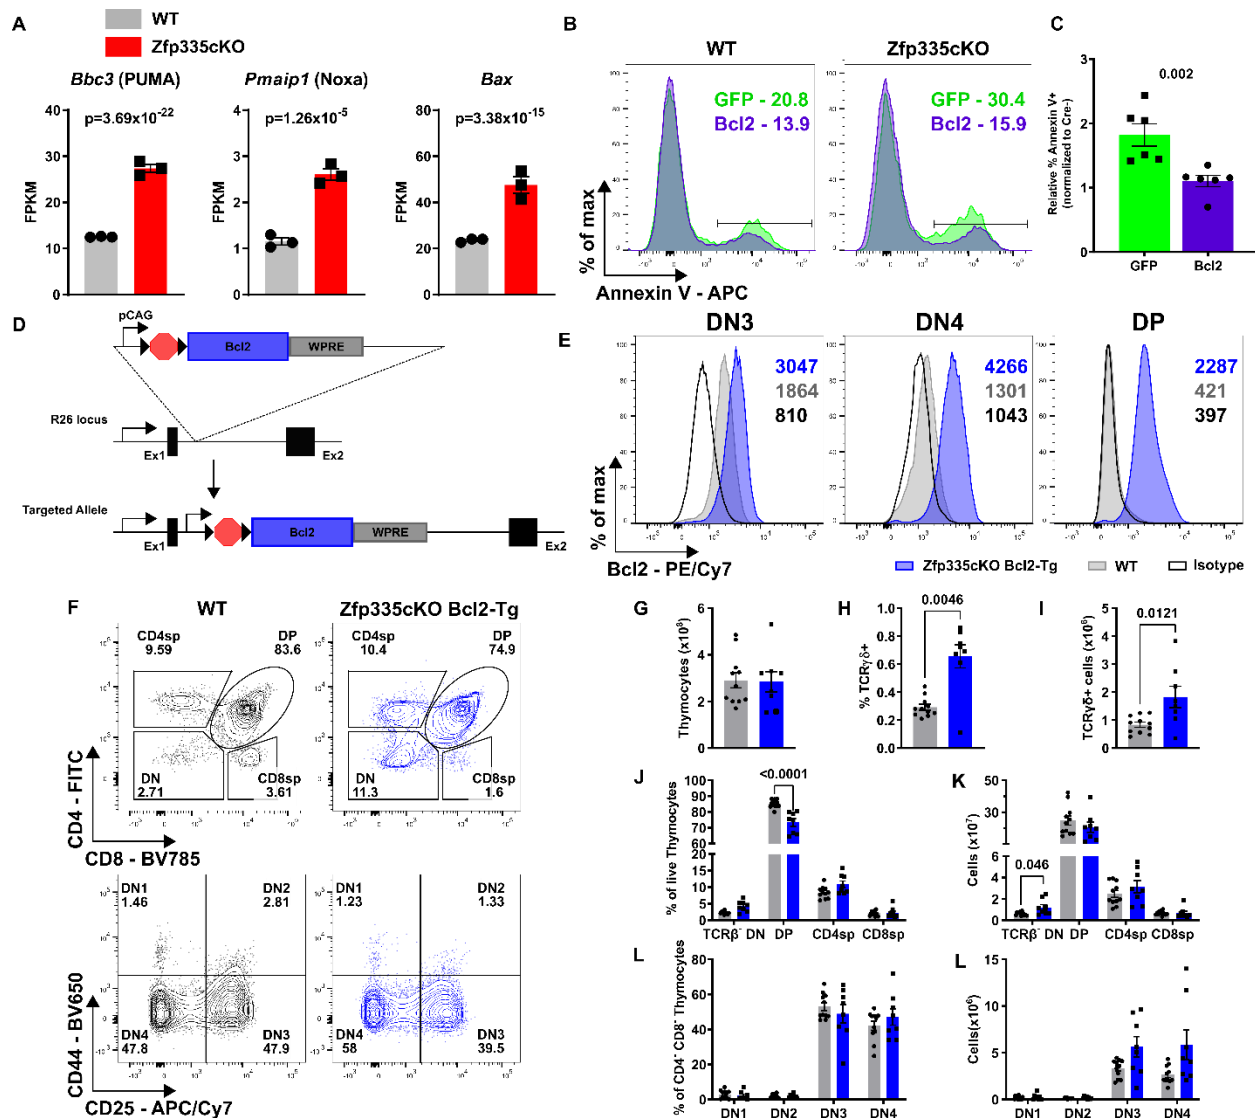

488

489 **Figure 3 – Bcl2 overexpression rescues Zfp335-deficient thymocytes from apoptosis.** (A)  
 490 Expression of pro-apoptotic Bcl2 family genes *Bbc3*, *Pmaip1*, or *Bax* from RNA-seq of control or  
 491 *Zfp335<sup>fl/fl</sup> E8<sub>III</sub>-cre* DP thymocytes. Representative gating (B) and quantification of apoptosis  
 492 among *Zfp335<sup>fl/fl</sup> E8<sub>III</sub>-cre* thymocytes transduced with Bcl2 or GFP RV after 5 days of OP9-DL1  
 493 culture (n=5). (E) Representative expression of isotype control (open black) or Bcl2 in WT (grey)  
 494 or *Zfp335<sup>fl/fl</sup> R26<sup>LSL-Bcl2</sup> E8<sub>III</sub>-cre* (blue) DN3, DN4 or DP thymocytes. (F) Gating for identification  
 495 of thymocyte subsets in WT WT (grey) or *Zfp335<sup>fl/fl</sup> R26<sup>LSL-Bcl2</sup> E8<sub>III</sub>-cre* (blue) mice. DN1-4 gating  
 496 pre-gated on TCR $\beta^+$ . (G) Total thymocyte numbers. Total numbers (H) and proportions (I) of  
 497 TCR $\delta^+$  cells. Frequencies (J) and total numbers (K) of DN, DP, CD4-SP and CD8-SP  
 498 thymocytes. Frequencies (L) and total numbers (M) of DN1-DN4 thymocytes. (F-M) n=11 WT or  
 499 n=8 *Zfp335<sup>fl/fl</sup> R26<sup>LSL-Bcl2</sup> E8<sub>III</sub>-cre*. Data compiled from one (A), two (B-C) or five (D-L)  
 500 independent experiments. P-values determined by Wald test (A), Mann-Whitney U-test (C) or  
 501 Two-way ANOVA with *post hoc* Sidak's test (H-M). Plots show mean  $\pm$  sem.

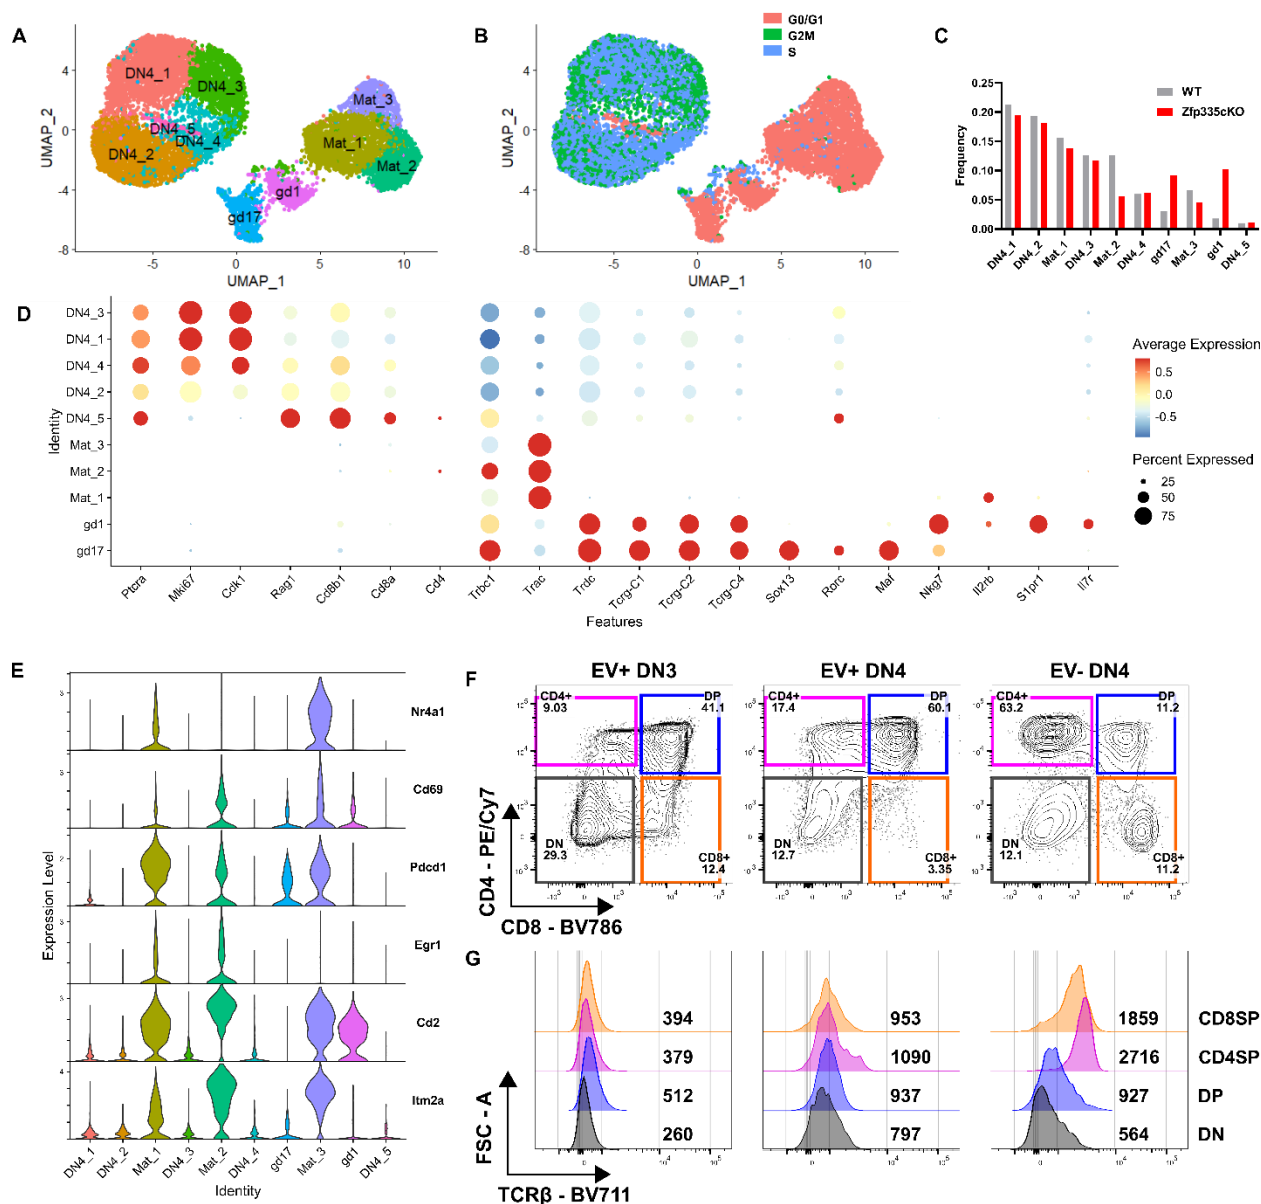

502

503 **Figure 4 – Defining the ‘true’ DN4 thymocyte population at the single cell level.** (A) UMAP  
 504 projection and identification of 10 clusters identified in full scRNA-seq dataset. (B) UMAP  
 505 colored by cell cycle phase. Blue or green identify actively cycling cells. (C) Frequency  
 506 distributions for WT (n=6357) and Zfp335cKO (n=5392) cells across the ten clusters. (D) Dot  
 507 plot of key cell type-defining genes. (E) Violin plots of positive selection signature genes in  
 508 thymocytes (Mingueneau et al. 2013). (F) Representative gating for CD4 vs. CD8 expression on  
 509 day 3 of OP9-DL1 cultures seeded with WT Thy1.1 retrovirus transduced (EV+) DN3 or DN4  
 510 cells or non-transduced (EV-) DN4 cells. (G) Representative TCRβ expression among DN, DP,  
 511 CD4SP or CD8SP cells from (F). Numbers indicate geometric MFI of TCRβ expression. (F-G)  
 512 Data representative of two independent experiments.

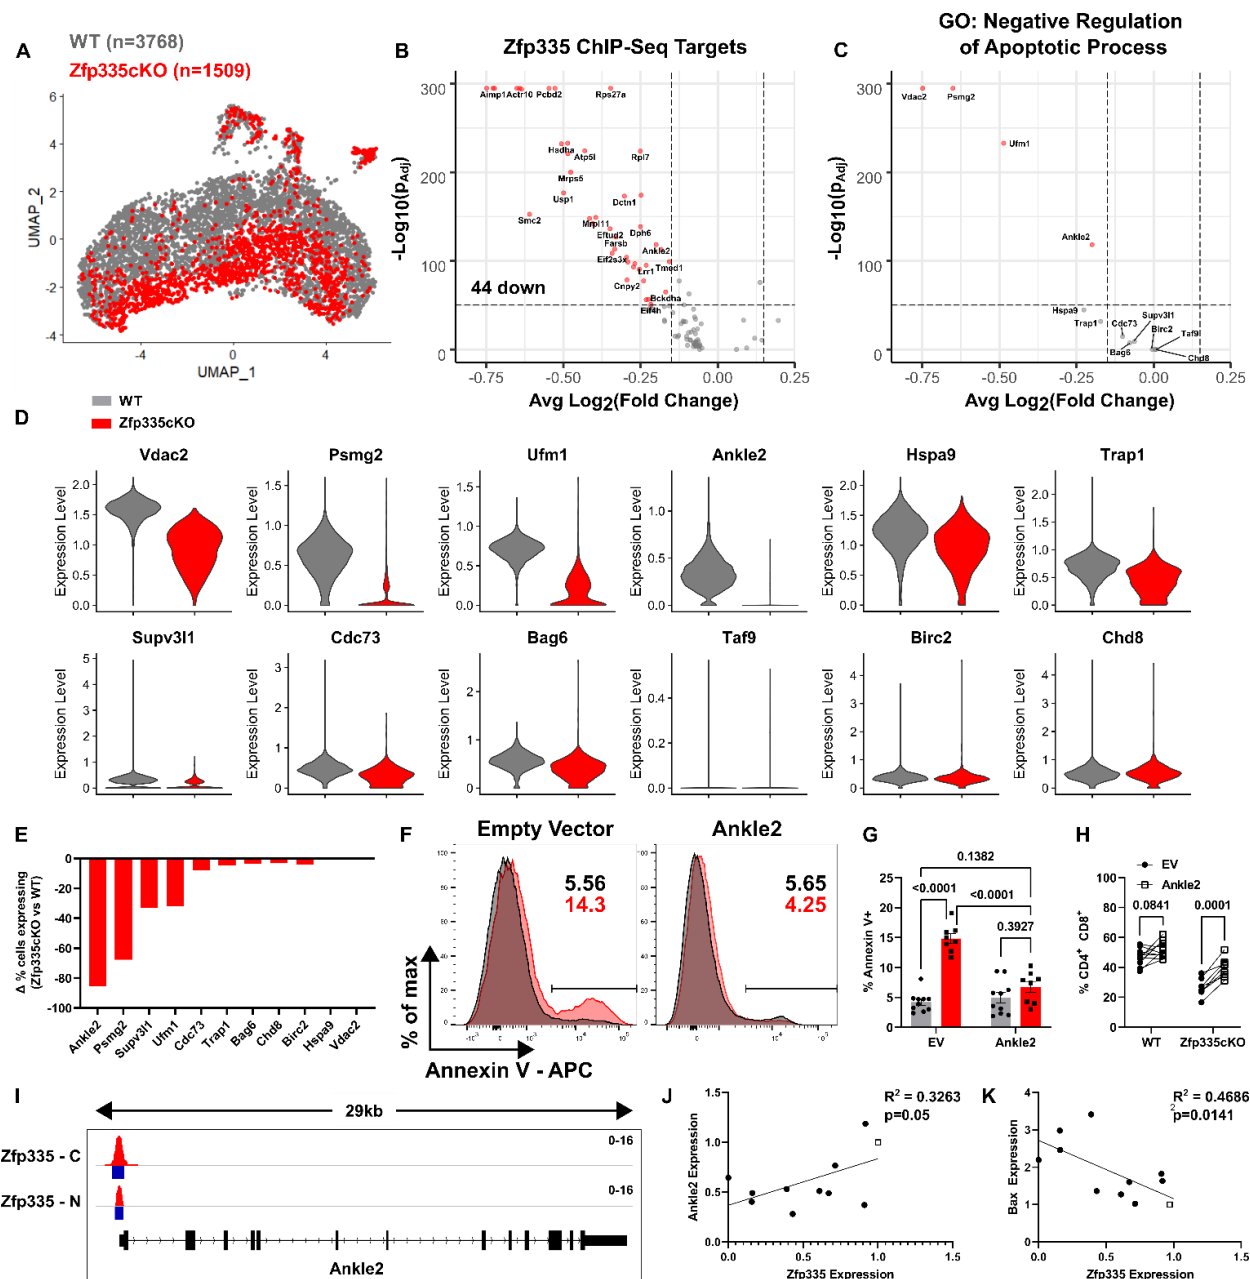

513

514 **Figure 5 – scRNA-seq identifies Ankle2 as a critical Zfp335-regulated gene controlling**  
 515 **survival of DN4 thymocytes.** (A) Violin plot of gene set score for Zfp335 target genes down-  
 516 regulated in mutant DP thymocytes (Fig 1L-M) and cutoff value used to identify true Zfp335  
 517 mutant cells (black box). (B) UMAP projections colored by genotype. Volcano plot of all  
 518 differentially expressed Zfp335 target genes (C) or those experimentally shown negatively  
 519 regulate apoptotic processes (D) between Zfp335 mutant and WT cells. (E) Violin plots of anti-  
 520 apoptotic Zfp335 target gene expression between Zfp335 mutant and WT DN4 cells. (F)  
 521 Differential proportions of Zfp335 mutant cells expressing anti-apoptotic genes from E compared  
 522 to WT cells. Representative gating (F) and quantification of apoptosis (G) or DP cell frequency  
 523 (H) for EV or Ankle2 retrovirus transduced WT (n=10) or Zfp335cKO (n=8) DN3 thymocytes  
 524 cultured on OP9-DL1 cells for 3 days. (I) Zfp335 ChIP-seq track of *Ankle2* locus in WT  
 525 thymocytes (Zfp335-C or Zfp335-N antibodies, GSE58293). Blue boxes indicate significant

526 binding peaks. Correlation between Ankle2 (J) or Bax (K) and Zfp335 expression in  
527 Scid.adh.2c2.SunTag CRISPRi cells expressing non-targeting (open squares) or Zfp335-  
528 targeting (closed circles) gRNAs. Data are compiled from one (A-E), two (J-K) or three (F-H)  
529 independent experiments. *P*-values determined by Wilcoxon Rank Sum test (B-C), two-way  
530 ANOVA with *post hoc* Tukey's test for multiple comparisons (G), repeated measures ANOVA  
531 with Sidak's test (H) or simple linear regression (J-K). Plots show mean  $\pm$  sem.

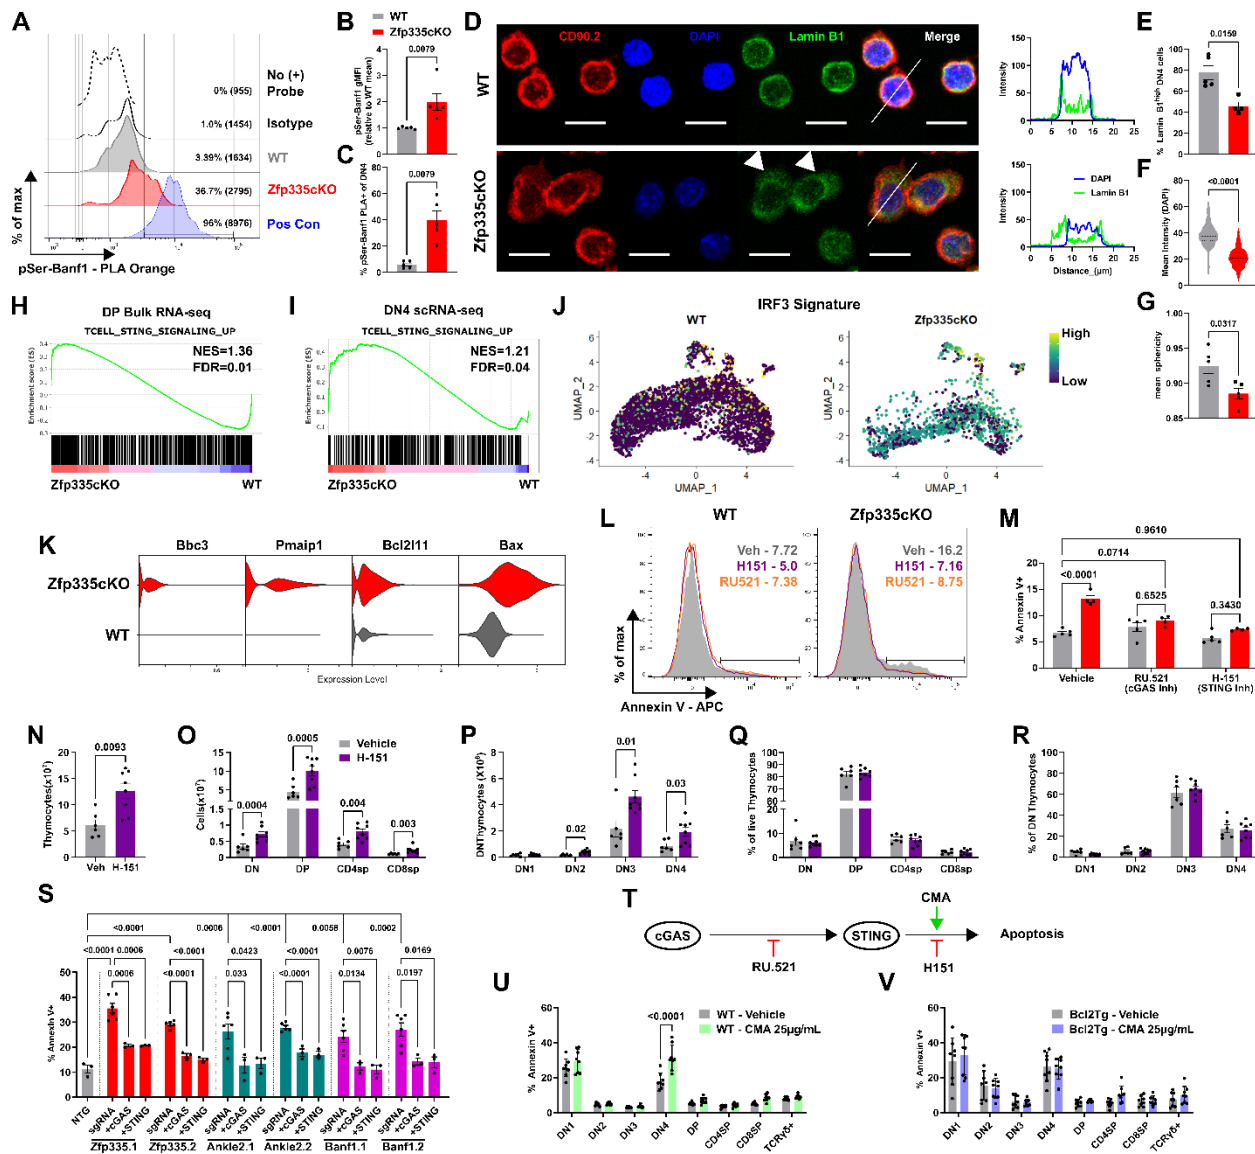

532

533 **Figure 6 – The Zfp335/Ankle2/Baf axis suppresses cGAS/STING-mediated apoptosis of**  
 534 **DN4 thymocytes.** (A) Representative histograms and gating of Baf phosphorylation as  
 535 measured by proximity ligation assay (PLA). Percent phosphoserine-Baf and geometric MFI in  
 536 parentheses are shown. Phosphoserine-Lamin B1 PLA was used as positive control.  
 537 Quantification of Baf phosphorylation based on geometric MFI (**B**) or percent positive cells (**C**).  
 538 (D) Representative immunofluorescence images of full cell thickness maximum intensity  
 539 projections (left) and profile plots (right) of nuclear envelope staining in *ex vivo* DN4 thymocytes.  
 540 Profile plots are based on white lines shown in merged images. Scale bars represent 10 $\mu$ m.  
 541 Quantification of frequency of cells with high nuclear-associated Lamin B1 (**E**), mean DAPI pixel  
 542 intensity (**F**) or mean nucleus sphericity (**G**) for *ex vivo* DN4 thymocytes. GSEA enrichment plots  
 543 for T cell-specific STING signaling gene signature in DP bulk (**H**) or DN4 scRNA-seq data sets  
 544 (**I**). **J** UMAP projection of IRF3 gene signature in WT or Zfp335 mutant DN4 thymocytes. **K**  
 545 Violin plots of pro-apoptotic Bcl2 gene expression in WT or Zfp335 mutant DN4 thymocytes.  
 546 Representative histograms (**L**) and quantification (**M**) of Annexin V-binding for WT or  
 547 Zfp335cKO DN4 thymocytes treated with cGAS (RU.521) or STING (H-151) inhibitors or vehicle

548 control and cultured on OP9-DL1 stromal cells for three days. Total thymocyte (N), DN, DP,  
549 CD4SP and CD8SP or DN1-DN4 cell numbers (O,P) or frequencies (Q,R) for Zfp335cKO mice  
550 treated with H-151 or vehicle *in vivo* for 7 days. (I-J) Thymocyte subset proportions for H-151 or  
551 vehicle treated Zfp335cKO mice. (S) Quantification of Annexin V binding among DN4 cells from  
552 *R26<sup>LSL-Cas9</sup> Tcrd<sup>CreERT2</sup>* thymocytes transduced with gRNA-expressing retroviruses and cultured  
553 for three days on OP9-DL1 cells with 4-hydroxytamoxifen. (T) Schematic diagram of inhibitors  
554 (RU.521 or H-151) or agonists (CMA) used to study cGAS/STING-dependent apoptosis of DN4  
555 thymocytes. Percent apoptosis induced by small molecule activation of STING among WT (U)  
556 or Zfp335cKO Bcl2Tg (V) thymocyte subsets. Values calculated by subtracting % Annexin V+ of  
557 vehicle-treated from % Annexin V+ of STING agonist-treated for each sample. *P*-values  
558 determined by Mann Whitney U-test (B-G,N) or two-way ANOVA with *post hoc* Tukey's test (M)  
559 or Sidak's test (O-P,U,V) or one-way ANOVA with *post hoc* Tukey's test (S). Data shown are  
560 compiled from one (H-K), two (L-M), three (A-G,U,V) or five (N-R) independent experiments.  
561 Plots show mean  $\pm$  sem or mean and interquartile range (F).

562

563

## 564 **Methods**

### 565 Mice

566 B6.Cg-Zfp335<sup>tm1Caw</sup> (Zfp335<sup>fl/fl</sup>, Stock No. 022413) and B6J.129(B6N)-  
567 *Gt(ROSA)26Sor<sup>tm1(CAG-cas9\*,-EGFP)Fezh/J</sup>* (R26<sup>LSL-Cas9</sup>, Stock No. 026175) mice were  
568 purchased from The Jackson Laboratory. C57BL/6J-Tg(Cd8a<sup>\*</sup>-cre)B6Asin (E8III-cre)  
569 mice were generously provided by Jung-Hyun Park (NIH). B6.129S-Tcrd<sup>tm1.1(cre/ERT2)Zhu</sup>  
570 (*Tcrd<sup>CreERT2</sup>*) have been maintained in our colony since original development. A modified  
571 Ai6 targeting vector to drive conditional overexpression of Bcl2 was generated by  
572 cloning in mouse *Bcl2* cDNA (Transomic Technologies) using FseI and SfiI restriction  
573 sites. R26<sup>LSL-Bcl2</sup> mice were generated by the Duke University Transgenic Facility using  
574 G4 mouse embryonic stem cells. Animals were maintained under specific pathogen-free  
575 conditions at the Cancer Center Isolation Facility of Duke University Medical Center. All  
576 experimental procedures were approved by the Institutional Animal Care and Use

577 Committee. All mice used in this study were 4-8 weeks old. For all experiments Cre-  
578 negative littermate controls were used unless otherwise stated.

### 579 Antibodies

580 All antibodies used in this study were purchased commercially and have previously  
581 been validated. Anti-TCR $\gamma\delta$  (GL3) was purchased from BD Biosciences. Anti- TCR $\gamma\delta$   
582 (GL3), rabbit anti-Lamin B (10H34L18), polyclonal rabbit anti-Banf1 (Cat. PA5-20329)  
583 and goat anti-rabbit IgG (H+L)-Alexa Fluor 647 were purchased from ThermoFisher  
584 Scientific. Anti-CD16/32 (2.4G2) was purchased from Tonbo Biosciences. Anti-CD90.1  
585 (OX7), anti-CD90.2 (30-H12), anti-CD4 (RM4-5), anti-CD8 (53-6.7), anti-CD44 (IM7),  
586 anti-CD25 (PC61), anti-CD62L (MEL-14), anti-TCR $\beta$  (H57-597), anti-CD27 (LG.3A10),  
587 anti-Bcl2 (BCL/10C4), anti-CD24 (M1/69), anti-B220 (RA3-6B2), anti-CD11b (M1/70),  
588 anti-CD11c (N418), anti-CD19 (6D5), anti-Ly6G/Ly6C (RB6-8C5), anti-NK1.1 (PK136),  
589 anti-TER119 (TER-119), anti-CD117/c-kit (2B8), anti-Phosphoserine (M380B), mouse  
590 IgG1 isotype control (MG1-45), mouse IgG1 isotype control (MOPC-21) and Annexin V  
591 were purchased from Biolegend.

### 592 Flow cytometry and cell sorting

593 Thymus or spleen tissues were harvested from 4-8 week old mice. Tissues were then  
594 dissociated in FACS Buffer (PBS supplemented with 2.5% FBS and 2mM EDTA) using  
595 a Dounce Homogenizer and filtered through 70 $\mu$ m nylon mesh (Genesee Scientific) to  
596 yield single-cell suspensions. For spleen samples, red blood cells were lysed using 1x  
597 RBC lysis buffer then resuspended in FACS buffer.  $0.5-1 \times 10^7$  cells were stained with  
598 fluorescently labelled antibodies for 30 minutes at 4°C then washed with excess FACS



599 buffer. Prior to analysis propidium iodide (Sigma-Aldrich, Cat. P4170) or DAPI (Sigma-  
600 Aldrich, Cat. D9542) were added to a final concentration of 0.5µg/mL or 100ng/mL,  
601 respectively for live/ dead discrimination. Cells were analyzed on a Fortessa X20 (BD  
602 Biosciences) or FACSCantoll (BD Biosciences) cytometer. For isolation of thymocyte  
603 subsets or virally transduced cells, sorting was performed using a FACSDiva (BD  
604 Biosciences) or Astrios (Beckman-Coulter) cell sorter. For sorting of thymocyte subsets  
605 *ex vivo*, staining included a lineage dump stain consisting of B220, CD11b, CD11c,  
606 CD19, GR-1, NK1.1, TCRβ, TCRγδ and TER119 antibodies. All analyses were  
607 performed using FlowJo v10 software (TreeStar).

#### 608 Bulk RNA-seq

609 DP thymocytes (Lin<sup>-</sup> CD4<sup>+</sup> CD8<sup>+</sup>) were FACS sorted from total thymus of 7-week-old  
610 female Zfp335<sup>fl/fl</sup> E8III-cre or Zfp335<sup>+/+</sup> E8III-cre mice. Purified DP cells were lysed with  
611 Trizol and RNA isolated using the DirectZol Micro RNA prep kit (Zymo) according to  
612 manufacturer's recommended protocol. gDNA was eliminated by on-column DNase  
613 digestion. Libraries were prepared using standard preparation protocols by BGI  
614 Genomics. 150bp paired-end sequencing was performed on the BGISEQ-500  
615 sequencing platform.

616 Paired-end reads were mapped to the mouse mm10 reference genome using the  
617 HiSat2 software and count matrices generated using the featureCounts function of the  
618 Subreads software package. Differential expression analysis was performed using  
619 edgeR and DeSeq2 implemented through iDep.91  
620 (<http://bioinformatics.sdstate.edu/idep90/>). Gene-Set Enrichment Analysis (GSEA) was

621 utilized to identify enriched pathways based on differential expression analysis using  
622 pre-ranked gene lists.

### 623 Cell Culture

624 OP9-DL1 cells, kindly provided by Maria Ciofani (Duke University) were cultured in  
625 MEM $\alpha$  (Gibco) supplemented with 10% FBS (Atlanta Biologicals) and 1x penicillin/  
626 streptomycin (Gibco). HEK293T cells were cultured in DMEM supplemented with 10%  
627 FBS, 1x penicillin/ streptomycin, 1x non-essential amino acids and 1x GlutaMAX. For  
628 OP9-DL1 culture of thymocytes, cultures were additionally supplemented with 5ng/mL  
629 recombinant mouse IL-7 (Biolegend). Scid.adh.2c2 cells were cultured in IMDM  
630 supplemented with 10% FBS (Hyclone), 1x penicillin/ streptomycin, 1x NEAA, 1x  
631 sodium pyruvate, 1x GlutaMAX, and 55 $\mu$ M  $\beta$ -mercaptoethanol. In some OP9-DL1  
632 cultures 5 $\mu$ g/mL RU.521 (Invivogen), 0.5 $\mu$ g/mL H-151 (Cayman Chemicals) or 25 $\mu$ g/mL  
633 Cridanimod (Cayman Chemicals) were added. All cultures were maintained at 37°C with  
634 5% CO<sub>2</sub>.

### 635 DN thymocyte enrichment

636 Total thymocytes were harvested from 4–8-week-old mice. Tissues were dissociated  
637 and strained through 30 $\mu$ m nylon mesh (Genesee Scientific). For purification of DN3/4  
638 thymocytes cells were stained with biotinylated antibodies against B220, CD3, CD4,  
639 CD8, CD11b, CD11c, CD19, CD44, c-Kit, GR-1, IgM, NK1.1, TCR $\beta$ , and TCR $\gamma\delta$ . For  
640 enrichment of total DN cells CD44 and c-Kit antibodies were excluded. Following  
641 antibody staining, cells were incubated with 50 $\mu$ L or 100 $\mu$ L of streptavidin magnetic  
642 particles (Spherotech, cat. SVM-40-100) / 10<sup>7</sup> cells at 2 x 10<sup>7</sup> cells/mL in FACS buffer

643 for total DN enrichment or DN3/4 purification, respectively. Particle-bound cells were  
644 separated three times on a magnetic rack.

#### 645 Retrovirus packaging and transduction

646 Retrovirus were generated by transfecting HEK293T cells with 1 $\mu$ g/mL each of MSCV  
647 transfer and pCL-Eco vectors using Lipofectamine 2000 (Invitrogen) or JetOptimus  
648 (Genesee Scientific) according to manufacturer's recommended protocols. Media was  
649 changed 24 hours post-transfection and viral supernatants harvested 24 hours later.  
650 DN3/4-enriched thymocytes were transduced with fresh viral supernatant via spinfection  
651 for 2 hours at 2300 rpm at 30°C with 6.7 $\mu$ g/mL polybrene (Millipore). Following  
652 spinfection cells were transferred to culture on OP9-DL1 stromal cells for overnight  
653 culture. 18-24 hours post-infection virally transduced (DsRed+ or Thy1.1+) DN3  
654 (CD25+) or DN4 (CD25-) were isolated by FACS sorting for an additional 3-5 days of  
655 culture in the OP9-DL1 culture system. For dual-targeting CRISPR experiments, equal  
656 volumes of sgRNA-Thy1.1 and -DsRed viral supernatants were mixed for transduction.

#### 657 scRNA-seq library preparation

658 For single cell RNA-sequencing, DN4 thymocytes (Live Lin<sup>-</sup> CD4<sup>-</sup> CD8<sup>-</sup> CD25<sup>-</sup> CD44<sup>-</sup>)  
659 were sorted from one male and one female mouse pooled for each genotype using an  
660 Astrios Sorter. Sorted cells were encapsulated into droplets and libraries were prepared  
661 using a Chromium Single Cell 3' Kit using the v3.1 chemistry. 7,000 cells per genotype  
662 were targeted. scRNA-seq libraries were pooled and sequenced on a NovaSeq S Prime  
663 Flow Cell yielding an average depth of 71,584 or 67,816 reads per cells for Zfp335cKO  
664 or WT samples, respectively.

665 scRNA-seq analysis

666 scRNA-seq data were processed using the Cell Ranger pipeline (10x Genomics).  
667 FASTQ files were generated from raw base call logs (bcl2fastq, v2.20), aligned to the  
668 mouse mm10 (release 93) reference genome (cellranger, v3.1.0; STAR v2.5.3a) to  
669 generate raw gene count matrices.

670 All downstream analyses were performed using the R software package Seurat (v4.0.0).  
671 Data was filtered to exclude cells with < 1,000 genes detected or < 1,000 UMIs.  
672 Doublets were excluded by filtering cells with > 60,000 UMIs. Low-quality cells were  
673 further filtered by removal of cells with > 7.5% mitochondrial gene expression. Gene  
674 expression matrices were then merged, data normalized, scaled and cell cycle scored  
675 using standard methods with Seurat. Dropouts were imputed using the R package  
676 ALRA. Cell cycle phase was regressed, and principal component analysis (PCA) was  
677 performed on the 6,000 most variable genes. 35 principal components were selected for  
678 downstream analysis based on JackStraw analysis. Dimensionality reduction was  
679 performed by Uniform Manifold Approximation and Projection (UMAP) and clustering  
680 defined using a resolution of 0.5. Gene expression was visualized by VlnPlot, DotPlot  
681 and FeaturePlot functions in Seurat. Gene signature scores were calculated using  
682 SingleCellSignatureExplorer and previously described methods <sup>69</sup>. Differential  
683 expression analysis was performed using the FindMarkers function in Seurat with  
684 Wilcoxon Rank Sum Test.

685 Cloning cDNA overexpression vectors

686 Bcl2 overexpression vector was generated by cloning Bcl2 cDNA (Transomic  
687 Technologies, Cat. TCM1304) into the pMSCV-loxp-dsRed-loxP-eGFP-puro-WPRE  
688 vector (Addgene #32702) using the EcoRI and NsiI restriction sites. Ankle2 cDNA  
689 (Transomic Technologies, Cat. TCM1004) was cloned into the MSCV-IRES-Thy1.1  
690 vector using NEBuilder Hifi Assembly (New England Biolabs). All vectors were  
691 propagated in Stbl3 cells (ThermoFisher Scientific).

#### 692 Generation of *Scid.adh.2c2-dCas9<sup>10x-GCN4</sup>* CRISPRi cells

693 dCas9<sup>10x-GCN4</sup> (pHRdSV40-dCas9-10xGCN4\_v4-P2A-BFP, Addgene #60904) was  
694 lentivirally transduced into *Scid.adh.2c2* cells, following which BFP+ cells were isolated  
695 by flow cytometry. Single cells were then cloned into 96 well plates and screened for  
696 knockdown efficiency using CD25 gRNA retroviral vectors. Clones exhibiting more than  
697 90% CD25 downmodulation were expanded for use in our studies.

#### 698 Generation of gRNA retroviral vectors

699 All gRNAs were designed using the CRISPick <sup>70</sup> gRNA design tool. All gRNAs were  
700 cloned into expression vectors by annealing followed by ligation into a BbsI cleavage  
701 site. The basic gRNA expression vector used was the MSCV-mU6-sgRNA-hPGK-  
702 Thy1.1 (kindly provided by Maria Ciofani). Knock-out gRNAs were first cloned into this  
703 Thy1.1 backbone. To generate DsRed expressing vectors for dual targeting, Thy1.1  
704 was removed by digestion with BamHI and EcoRI and replaced with DsRed Express II  
705 by NEBuilder Hifi Assembly. The CRISPRi retroviral vector was generated by first  
706 cloning the pSV40-scFv-GCN4-sfGFP-VP64-GB1-NLS (Addgene #60904) fusion

707 construct into the MSCV-mU6-sgRNA-hPGK backbone followed by replacement of  
708 VP64 with KRAB using NEBuilder.

#### 709 qPCR analysis of gene expression

710 Following viral transduction, Scid.adh.2c2.dCas9<sup>10x-GCN4</sup> cells were assessed for  
711 transduction efficiency by flow cytometry. For samples exceeding 90% GFP+ 10<sup>6</sup> cells  
712 were lysed in Trizol and RNA isolated using the Direct-Zol MicroPrep kit. 500ng of RNA  
713 was reverse transcribed using SuperScript III Reverse Transcriptase (Invitrogen) with  
714 random hexamers according to the manufacturer's recommended protocol. 5ng of  
715 cDNA per 25µL reaction was then used for gene expression analysis with PowerTrack  
716 Sybr Green Master Mix (Applied Biosciences) according to the manufacturer's  
717 recommended protocol using fast cycling conditions with an Eppendorf MasterCycler  
718 qPCR machine. Relative expression was determined using the ddCt method with  
719 Gapdh being used for normalization.

#### 720 Proximity Ligation Assay for Baf phosphorylation

721 Proximity ligation assays were performed using the Duolink<sup>®</sup> flowPLA Detection  
722 Kit – Orange (Millipore Sigma, Cat. DUO94003) according to manufacturers  
723 recommended protocol with minor changes. Briefly, total thymocytes were prepared as  
724 described in flow cytometry and cell sorting methods section. 10<sup>7</sup> thymocytes were  
725 stained with surface antibodies to distinguish all major thymocyte subsets. Next, cells  
726 were fixed with 4% paraformaldehyde for 10 minutes, washed and permeabilized for 30  
727 minutes at room temperature. After permeabilization, cells were blocked for 1 hour at  
728 37°C with 300µl of Duolink<sup>®</sup> blocking solution then stained overnight at 4°C with purified

729 mouse anti-Phosphoserine (Biolegend) or purified mouse IgG1 isotype control (clone  
730 MG1-45, Biolegend) and purified rabbit anti-Banf1 (ThermoFisher Scientific) or rabbit  
731 anti-Lamin B1 (ThermoFisher Scientific) diluted in Duolink<sup>®</sup> antibody diluent. After each  
732 step cells were washed twice with 1mL or Duolink<sup>®</sup> In Situ wash buffer. Next, cells were  
733 incubated for 1 hour at 37°C with Duolink<sup>®</sup> In Situ PLA<sup>®</sup> Probe Anti-Rabbit PLUS (Sigma  
734 Millipore, Cat. DUO92002) and Duolink<sup>®</sup> In Situ PLA<sup>®</sup> Probe Anti-Mouse MINUS (Sigma  
735 Millipore, Cat. DUO92004) diluted in Duolink<sup>®</sup> antibody diluent. Additional controls in  
736 which individual probes were omitted were also prepared. Following probe incubation,  
737 cells were washed then incubated for 30 minutes at 37°C with 1x Duolink<sup>®</sup> ligation  
738 reaction mixture, washed again and incubated for 90 minutes with 1x Duolink<sup>®</sup>  
739 amplification reaction mixture. Following amplification, cells were incubated with 1x  
740 Duolink<sup>®</sup> Detection Solution – Orange for 15 minutes at 37°C. Cells were finally washed,  
741 resuspended in PBS and assayed using a FortessaX20 cytometer (BD Biosciences).

#### 742 Determination of nuclear envelope structure

743  $5 \times 10^4$  HeLa cells per well were reverse transfected with 15pmol siRNA using  
744 Lipofectamine RNAiMax (ThermoFisher Scientific) in an 8 well chamber slide according  
745 to recommended protocols. ANKLE2 and universal non-targeting control siRNAs were  
746 purchased from IDT (Design ID: hs.Ri.ANKLE2.13). BANF-targeting siRNAs were  
747 purchased from ThermoFisher Scientific (IDs: s16807, s16808, 26065). 48 hours post-  
748 transfection cells were fixed with 4% paraformaldehyde for 10 minutes at room  
749 temperature and permeabilized with permeabilization buffer for 1h at RT temperature.  
750 Primary antibody Lamin B (Invitrogen, Cat. 702972) were added for overnight incubation  
751 at 4°C and washed with 1X PBS for three times. After that, secondary antibody Alexa

752 Fluor 647-conjugated goat anti-rabbit antibody (Invitrogen, Cat. A32733) were added for  
753 12h at 4C in the dark. After washing with 1X PBS for three times, slides were mounted  
754 with DAPI-containing mounting media (VECTORLAB, Cat. H-1200). Images were  
755 collected using Zeiss 780 upright confocal.

756 To analyze nuclear structure DAPI channel images were converted to binary with  
757 ImageJ. Following binarization, the Watershed function was used to separate touching  
758 cells. Circularity was then determined with a minimum threshold of 500 px<sup>2</sup>.

### 759 *In vivo* H-151 treatment of mice

760 Mice were administered 750 pmol (210µg) of H-151 (Cayman Chemicals) or vehicle via  
761 intraperitoneal injection daily for 7 days beginning at 7 weeks of age. The vehicle for  
762 injections was sterile PBS + 10% Tween-80 (VWR).

### 763 Statistical analysis

764 Statistical tests were performed using GraphPad v9.0.0 (Prism). For graphs with  
765 multiple comparisons being made, two-way ANOVA was performed with post-hoc  
766 Sidak's test or Tukey's test for multiple comparisons. For comparisons of cell numbers,  
767 data was log transformed prior to statistical tests. For all Two-way ANOVA tests  
768 normality tests were performed to ensure normalcy assumptions were met. For graphs  
769 of single comparisons, a two-tailed Mann-Whitney test was used. All significant p-values  
770 are shown in each graph. No statistical methods were used to predetermine sample  
771 size.

### 772 **Data and code availability**



773 Data generated in this study can be accessed upon publication through NCBI Gene  
 774 Expression Omnibus (<https://www.ncbi.nlm.nih.gov/geo/>) under accession GSE189244.

775

776 **Supplementary Information**

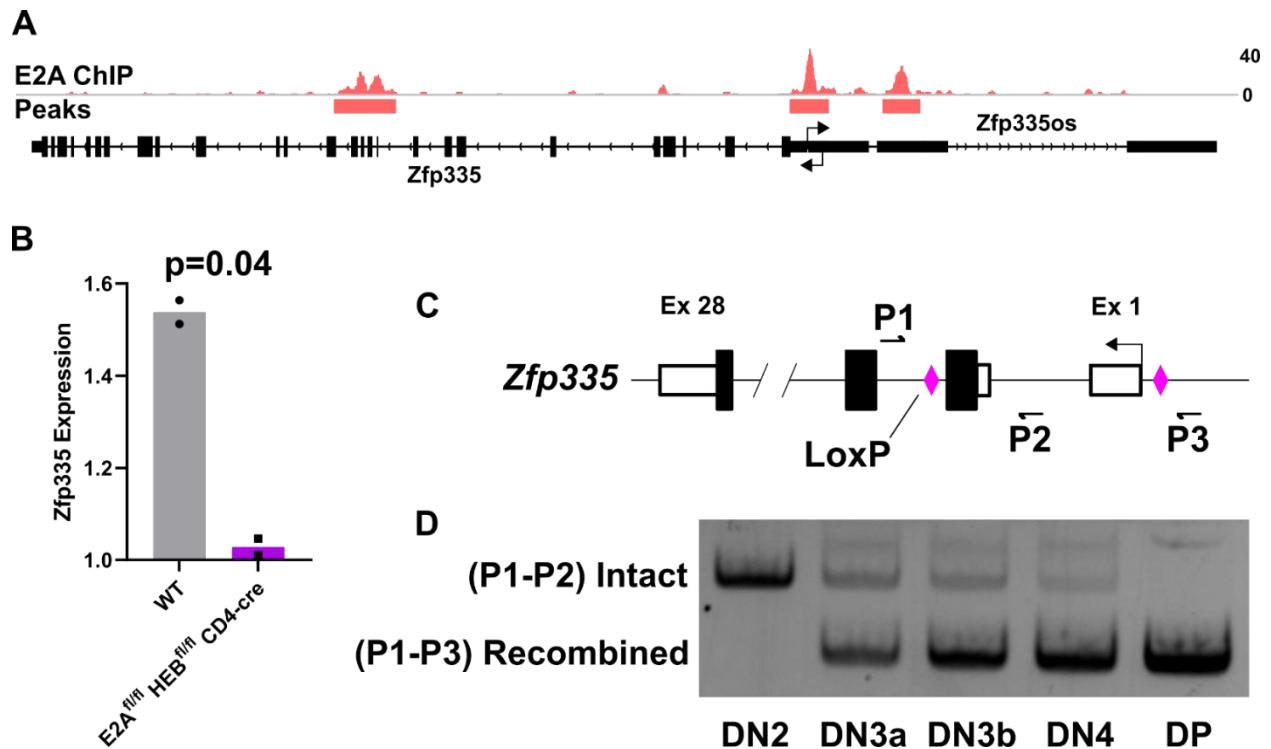

777

778 **Supplementary Figure 1 – Zfp335 is a target of E proteins in developing T cells.** (A) E2A  
 779 ChIP-seq track for *Zfp335* locus in *Id2<sup>fl/fl</sup> Id3<sup>fl/fl</sup> Lck-cre* DP thymocytes (GSE89849). (B) *Zfp335*  
 780 transcript abundance in WT vs. E2A/HEB double knock-out DP thymocytes determine by  
 781 microarray (GSE9749). (C) Schematic diagram for PCR-based determination of *Zfp335*  
 782 recombination kinetics. Small arrows indicate approximate positions for primers (P1-3) used for  
 783 assay. (D) Representative assessment of *Zfp335* recombination in sort purified *Zfp335<sup>fl/fl</sup> E8III-  
 784 cre* DN2, DN3a, DN3b, DN4 or DP thymocytes. Data are representative of four individual  
 785 experiments.

786

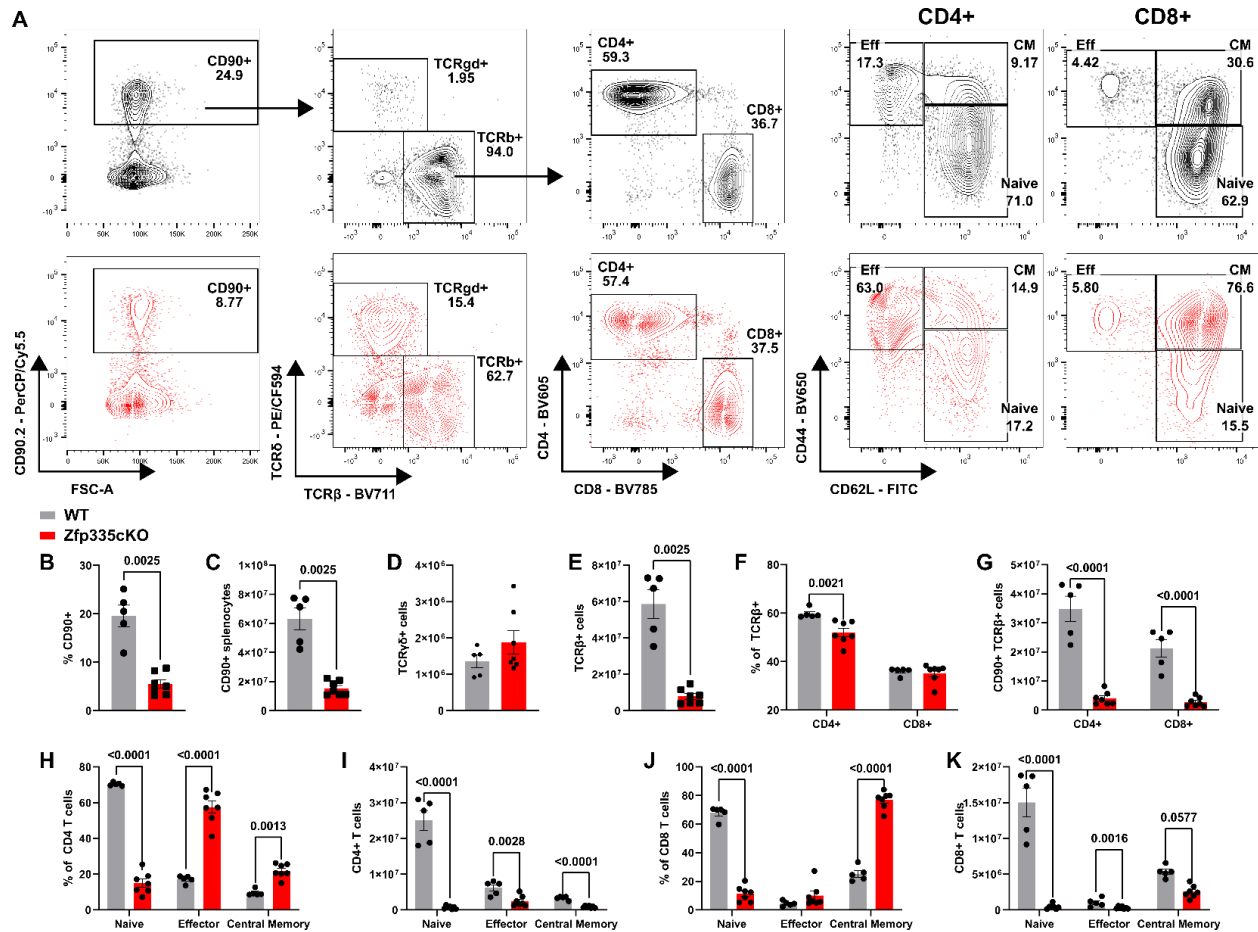

787

788 **Supplementary Figure 2 – Zfp335cKO mice exhibit T lymphopenia and reduced peripheral**  
 789 **naïve T cells.** (A) Gating schema for identification of WT (black) or Zfp335cKO (red) splenic T  
 790 cell populations beginning with live (DAPI<sup>+</sup>) splenocytes. Proportion (B) or total numbers (C) of  
 791 splenic CD90<sup>+</sup> cells. Total numbers of TCRγδ<sup>+</sup> (D) or TCRαβ<sup>+</sup> (E). Proportions (F) and total  
 792 numbers of CD4<sup>+</sup> or CD8<sup>+</sup> TCRαβ cells. Proportions (H, J) and numbers (I, K) of naïve, effector  
 793 or central memory T cells within the CD4<sup>+</sup> or CD8<sup>+</sup> compartment. WT (n=5) or Zfp335cKO  
 794 (n=7) from two separate experiments. *P*-values determined by Mann-Whitney U-test (B-E) or  
 795 Two-Way ANOVA with *post hoc* Sidak test (F-K). Plots show mean ± sem.

796

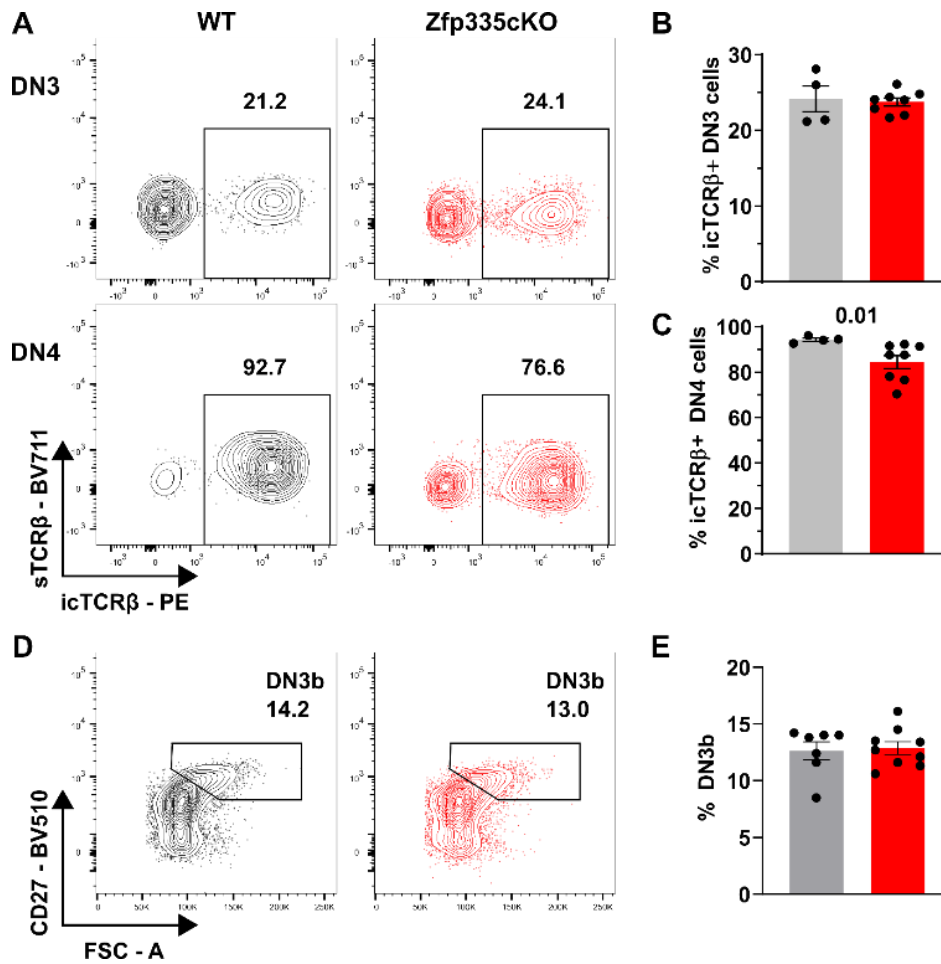

797

798 **Supplementary Figure 3 – Loss of Zfp335 during DN3 does not impair  $\beta$ -selection.** (A)  
 799 Gating for icTCR $\beta$  expression among DN3 (CD90<sup>+</sup> TCR $\delta$ <sup>-</sup> CD4<sup>-</sup> CD8<sup>-</sup> sTCR $\beta$ <sup>-</sup> CD44<sup>-</sup> CD25<sup>+</sup>) or  
 800 DN4 (CD90<sup>+</sup> TCR $\delta$ <sup>-</sup> CD4<sup>-</sup> CD8<sup>-</sup> sTCR $\beta$ <sup>-</sup> CD44<sup>-</sup> CD25<sup>-</sup>) thymocytes. Frequency of icTCR $\beta$  DN3  
 801 (B) or DN4 (C) cells among WT (n=4) or Zfp335cKO (n=8) mice. (D) Flow cytometric gating for  
 802 identification of WT or Zfp335cKO DN3b thymocytes pre-gated on total DN3 cells. (E)  
 803 Quantification of DN3b frequency among WT or Zfp335cKO DN3 thymocytes. *P*-values  
 804 determined by Two-way ANOVA with *post hoc* Sidak test (B,C) or Mann-Whitney U-Test (E).  
 805 Plots show mean  $\pm$  sem.

806

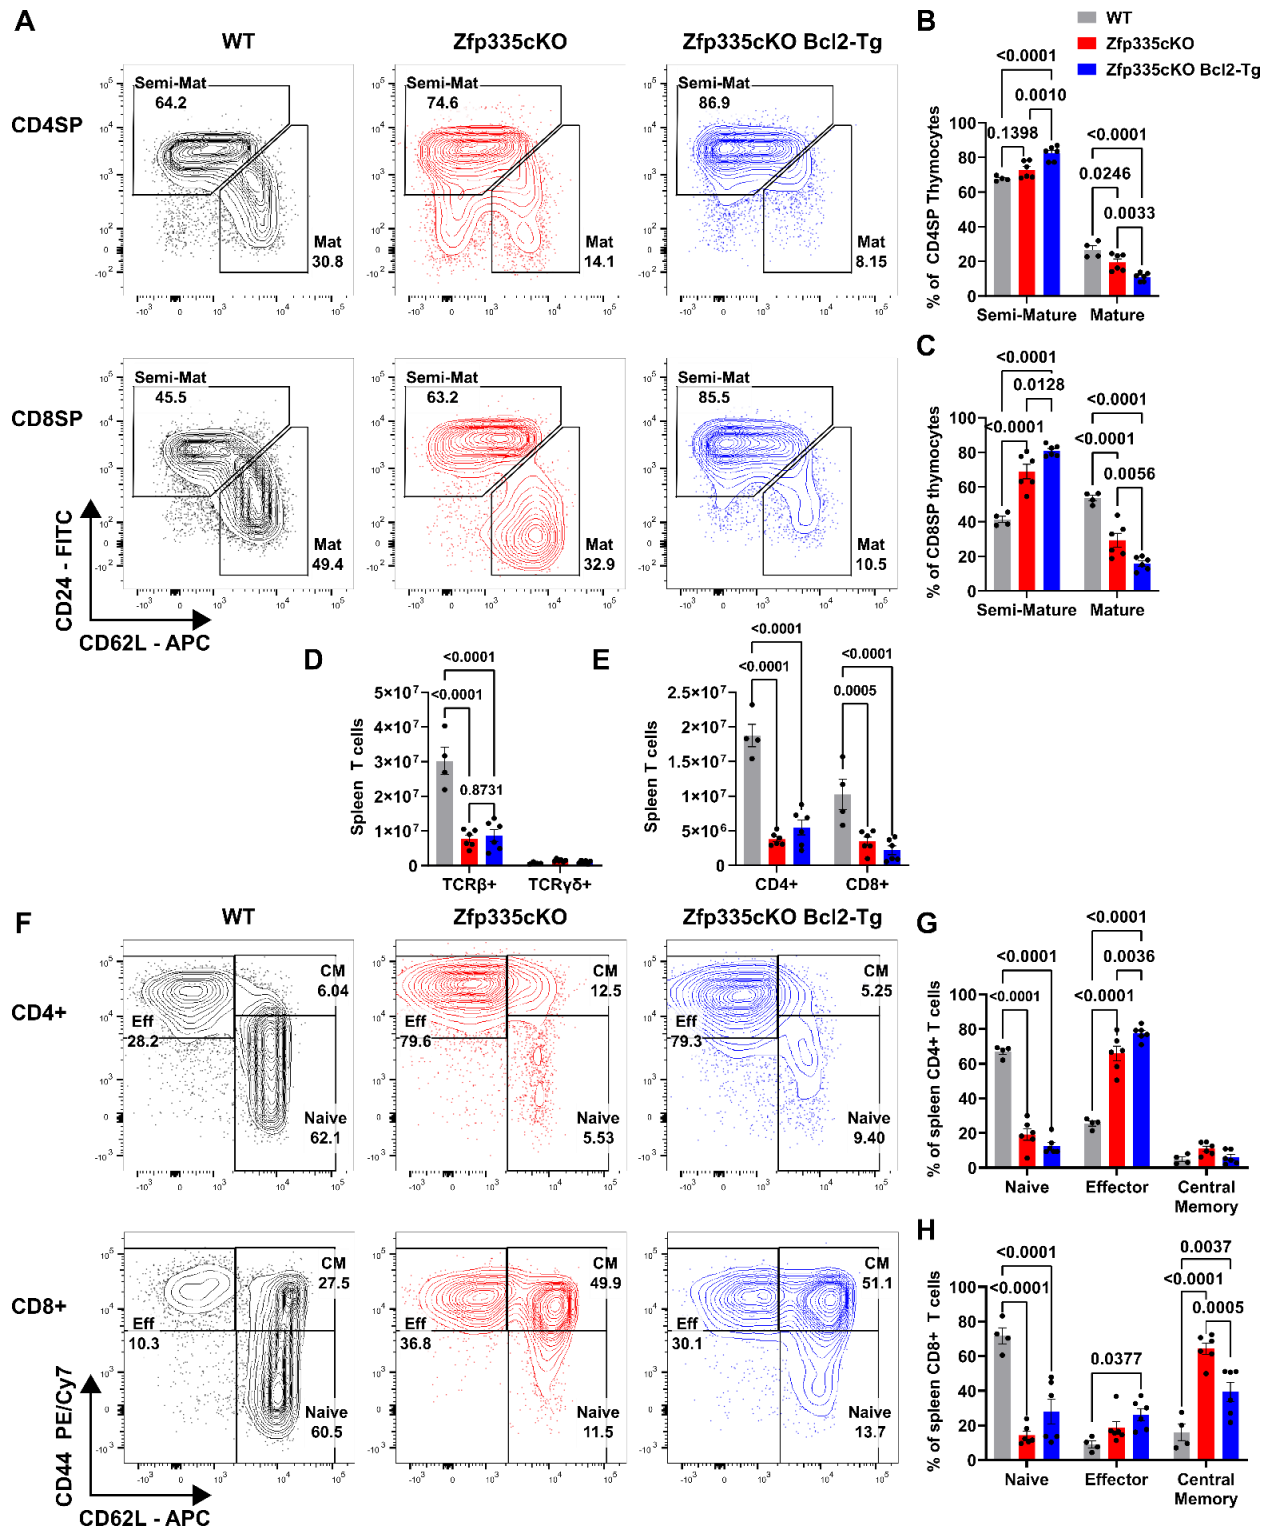

807

808 **Supplementary Figure 4 – Bcl2 overexpression fails to rescue thymic differentiation**  
 809 **defect and peripheral T lymphopenia in Zfp335-deficient mice.** Representative gating (A)  
 810 and quantification of CD4SP (B) or CD8SP (C) thymic maturation. Total splenic TCR $\beta$  and  
 811 TCR $\gamma\delta$  (D) T cells. Quantification of total splenic CD4+ or CD8+ TCR $\beta$ + T cells. Representative  
 812 gating (F) and quantification of splenic CD4+ (G) or CD8+ T cell effector status. n=4 WT, n=6



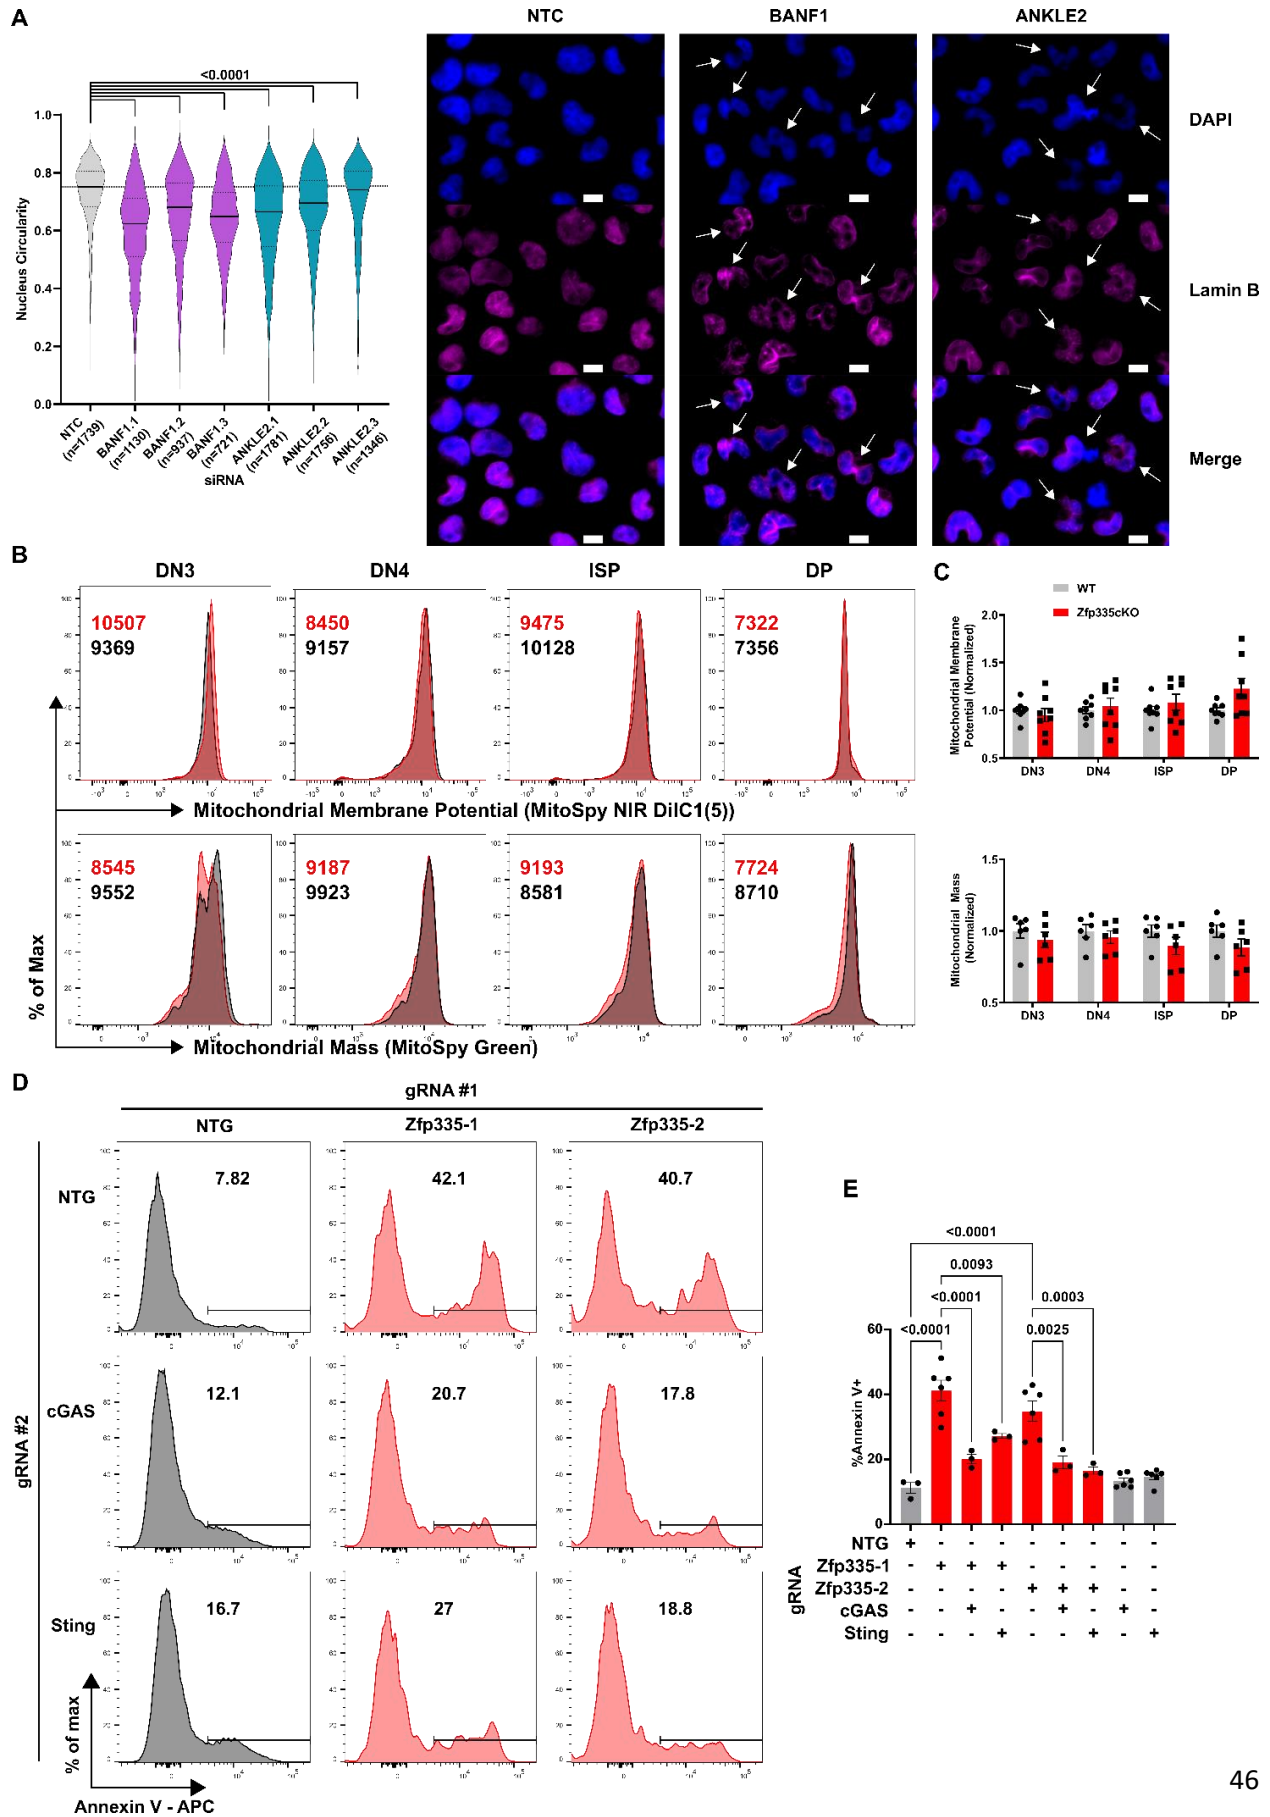

830 **Supplemental Figure 6 – Ankle2/BANF1 control nuclear envelope architecture.**  
 831 Quantification of nuclear circularity (A) in Hela cells transfected with non-targeting control  
 832 (NTC), BANF1-, or ANKLE2-targeting siRNAs 48 hours post-transfection (left). Representative  
 833 images DAPI or Lamin B staining of siRNA transfected Hela cells (right). Scale bars are 10µm.  
 834 Arrows indicate cells with severely disrupted nuclear envelope architecture. Representative  
 835 histograms (B) and compiled data (C) for mitochondrial membrane potential (top) or total  
 836 mitochondrial mass (bottom) in WT or Zfp335cKO thymocyte populations *ex vivo*.  
 837 Representative gating (D) and quantification (E) of Annexin V binding among DN4 cells from  
 838 *R26<sup>LSL-Cas9</sup> E8<sub>III</sub>-cre* DN3/4 thymocytes transduced with indicated gRNA-expressing retroviruses  
 839 and cultured for three days on OP9-DL1 cells. P-values calculated using One-Way ANOVA with  
 840 Dunnett's post hoc test. Plots show mean ± sem (G) or median (solid line) and interquartile  
 841 range (dotted lines) (E). Data are compiled from two (B-E) or three (F-G) independent  
 842 experiments.

843 **Table S1. Primer sequences (Related to Figures S1, 3, 5, 6 and S6)**

| Primer         | Gene                   | Sequence                                           | Purpose                               |
|----------------|------------------------|----------------------------------------------------|---------------------------------------|
| Zfp335-F       | <i>Zfp335</i>          | CATGTGTTTTCTGGGAAAAACT                             | Zfp335 <sup>fl/fl</sup> recombination |
| Zfp335-ex2F    | <i>Zfp335</i>          | GACCGTCCCAGGATTAAC                                 | Zfp335 <sup>fl/fl</sup> recombination |
| Zfp335-ex2R    | <i>Zfp335</i>          | CTCTCCATGATCACTACCC                                | Zfp335 <sup>fl/fl</sup> recombination |
| FseI-Kz-Bcl2-F | <i>Bcl2</i>            | AAGGCCGGCCGCCACCATGGCGCAAGCCGGGA                   | Ai6-Bcl2 cloning                      |
| Sfil-Bcl2-R    | <i>Bcl2</i>            | AAGGCCTGTGTGGCC <del>TC</del> ACTTGTGGCCAGGTATGCAC | Ai6-Bcl2 cloning                      |
| Ankle2-NEB-F   | <i>Ankle2</i>          | AGATCTCTCGAGATCGATGCATGCTGTGGCAGCGGCTG             | MSCV-Ankle2-IRES-Thy1.1 cloning       |
| Ankle2-NEB-R   | <i>Ankle2</i>          | TATCGGGAATTATCGATGCATCACAGAGAAATGAAGTCCAGGGC       | MSCV-Ankle2-IRES-Thy1.1 cloning       |
| mmGapdh-F      | <i>Gapdh</i>           | GTCATCCCAGAGCTGAACG                                | RT-qPCR                               |
| mmGapdh-R      | <i>Gapdh</i>           | TCATACTTGGCAGGTTTCTCC                              | RT-qPCR                               |
| mmAnkle2-F     | <i>Ankle2</i>          | TTAAACCGGGACCCTTTGAT                               | RT-qPCR                               |
| mmAnkle2-R     | <i>Ankle2</i>          | ATATGAGGATGGCCCTGTGA                               | RT-qPCR                               |
| mmZfp335-F     | <i>Zfp335</i>          | CCAGGAACAGACAGTGACCAA                              | RT-qPCR                               |
| mmZfp335-R     | <i>Zfp335</i>          | CCTTCCTGGACCTGGATATGA                              | RT-qPCR                               |
| mmBax-F        | <i>Bax</i>             | TGAAGACAGGGGCCTTTTTG                               | RT-qPCR                               |
| mmBax-R        | <i>Bax</i>             | AATTCGCCGGAGACTCG                                  | RT-qPCR                               |
| Zfp335_iT1     | <i>Zfp335</i> Promoter | ttgtttGACCTCGTCGATGCCGGAGT                         | CRISPRi                               |
| Zfp335_iT2     | <i>Zfp335</i> Promoter | ttgtttGCTGTGTGCTCTCCGACTC                          | CRISPRi                               |
| Zfp335_iT3     | <i>Zfp335</i> Promoter | ttgtttAGGCTCAGGTTAGCGGCAGC                         | CRISPRi                               |

|             |                           |                                       |                             |
|-------------|---------------------------|---------------------------------------|-----------------------------|
| Zfp335_iT4  | <i>Zfp335</i><br>Promoter | ttgtttCTCAGGTTAGCGGCAGCCGG            | CRISPRi                     |
| Zfp335_iT5  | <i>Zfp335</i><br>Promoter | ttgtttCTGCCGCTAACCTGAGCCTC            | CRISPRi                     |
| Zfp335_iB1  | <i>Zfp335</i><br>Promoter | aaacACTCCGGCATCGACGAGGTCaa            | CRISPRi                     |
| Zfp335_iB2  | <i>Zfp335</i><br>Promoter | aaacGAGTCGGAGAGCGACACAGCaa            | CRISPRi                     |
| Zfp335_iB3  | <i>Zfp335</i><br>Promoter | aaacGCTGCCGCTAACCTGAGCCTaa            | CRISPRi                     |
| Zfp335_iB4  | <i>Zfp335</i><br>Promoter | aaacCCGGCTGCCGCTAACCTGAGaa            | CRISPRi                     |
| Zfp335_iB5  | <i>Zfp335</i><br>Promoter | aaacGAGGCTCAGGTTAGCGGCAGaa            | CRISPRi                     |
| Zfp335_kT1  | <i>Zfp335</i> exon<br>7   | ttgtttGTACCCCGAGACCTCGACGG            | <i>Ex vivo</i> CRISPR<br>KO |
| Zfp335_kB1  | <i>Zfp335</i> exon<br>7   | aaacCCGTCTGAGGTCTCGGGGTACaa           | <i>Ex vivo</i> CRISPR<br>KO |
| Zfp335_kT2  | <i>Zfp335</i> exon<br>16  | ttgtttACCACAATCATCTACCAGCA            | <i>Ex vivo</i> CRISPR<br>KO |
| Zfp335_kB2  | <i>Zfp335</i> exon<br>16  | aaacTGCTGGTAGATGATTGTGGTaa            | <i>Ex vivo</i> CRISPR<br>KO |
| Ankle2_kT1  | <i>Ankle2</i> exon<br>4   | ttgtttGCGGAAAGCTGTGAAAACG             | <i>Ex vivo</i> CRISPR<br>KO |
| Ankle2_kB1  | <i>Ankle2</i> exon<br>4   | aaacCGTTTTTCGACAGCTTCCGCaa            | <i>Ex vivo</i> CRISPR<br>KO |
| Ankle2_kT2  | <i>Ankle2</i><br>exon10   | ttgtttGGGAGCTAGCTCATGAGCTG            | <i>Ex vivo</i> CRISPR<br>KO |
| Ankle2_kB2  | <i>Ankle2</i> exon<br>10  | aaacCAGCTCATGAGCTAGCTCCaa             | <i>Ex vivo</i> CRISPR<br>KO |
| Banf1_kT1   | <i>Banf1</i> exon 2       | ttgtttTTGGTGACGTCTGAGCAAG             | <i>Ex vivo</i> CRISPR<br>KO |
| Banf1_kB1   | <i>Banf1</i> exon 2       | aaacCTTGCTCAGGACGTCACCAaa             | <i>Ex vivo</i> CRISPR<br>KO |
| Banf1_kT2   | <i>Banf1</i> exon 2       | ttgtttACTTCGTGGCAGAGCCCATG            | <i>Ex vivo</i> CRISPR<br>KO |
| Banf1_kB2   | <i>Banf1</i> exon 2       | aaacCATGGGCTCTGCCACGAAGTaa            | <i>Ex vivo</i> CRISPR<br>KO |
| Mb21d1_kT   | <i>Mb21d1</i><br>exon 3   | ttgtttTGATAAGAAGTGTACAGCA             | <i>Ex vivo</i> CRISPR<br>KO |
| Mb21d1_kB   | <i>Mb21d1</i><br>exon 3   | aaacTGCTGTAACACTTCTTATCAaa            | <i>Ex vivo</i> CRISPR<br>KO |
| Tmem173_kT  | <i>Tmem173</i><br>exon 6  | ttgtttCTACATAACAACATGCTCAG            | <i>Ex vivo</i> CRISPR<br>KO |
| Tmem173_kB  | <i>Tmem173</i><br>exon 6  | aaacCTGAGCATGTTGTTATGTAGaa            | <i>Ex vivo</i> CRISPR<br>KO |
| DsRed-NEB-F | dsRed                     | CCGACCTCTCTCCCAGGGGATGGATAGCACTGAGAAC | Replace                     |



|             |                  |                                         |                                                |
|-------------|------------------|-----------------------------------------|------------------------------------------------|
|             | Express II       |                                         | Thy1.1 with dsRed in CRISPR KO vectors         |
| DsRed-NEB-R | dsRed Express II | ATAAAATCTTTTATTTTATCGCTACTGGAACAGGTGGTG | Replace Thy1.1 with dsRed in CRISPR KO vectors |

844

845

## 846 References

- 847 1. Krueger, A., Zietara, N. & Lyszkiewicz, M. T Cell Development by the Numbers. *Trends Immunol*  
848 **38**, 128-139 (2017).
- 849 2. Li, L., Leid, M. & Rothenberg, E.V. An early T cell lineage commitment checkpoint dependent on  
850 the transcription factor Bcl11b. *Science* **329**, 89-93 (2010).  
851
- 852 3. Tourigny, M.R., Mazel, S., Burtrum, D.B. & Petrie, H.T. T cell receptor (TCR)-beta gene  
853 recombination: dissociation from cell cycle regulation and developmental progression during T  
854 cell ontogeny. *J Exp Med* **185**, 1549-1556 (1997).  
855
- 856 4. Wojciechowski, J., Lai, A., Kondo, M. & Zhuang, Y. E2A and HEB are required to block thymocyte  
857 proliferation prior to pre-TCR expression. *J Immunol* **178**, 5717-5726 (2007).  
858
- 859 5. Boudil, A. *et al.* IL-7 coordinates proliferation, differentiation and Tcr $\alpha$  recombination during  
860 thymocyte beta-selection. *Nat Immunol* **16**, 397-405 (2015).  
861
- 862 6. Kelly, A.P. *et al.* Notch-induced T cell development requires phosphoinositide-dependent kinase  
863 1. *EMBO J* **26**, 3441-3450 (2007).  
864
- 865 7. Guidos, C.J. Synergy between the pre-T cell receptor and Notch: cementing the alphabeta  
866 lineage choice. *J Exp Med* **203**, 2233-2237 (2006).  
867
- 868 8. Yamasaki, S. *et al.* Mechanistic basis of pre-T cell receptor-mediated autonomous signaling  
869 critical for thymocyte development. *Nat Immunol* **7**, 67-75 (2006).  
870

871

- 872 9. Fehling, H.J., Krotkova, A., Saint-Ruf, C. & von Boehmer, H. Crucial role of the pre-T-cell receptor  
873 alpha gene in development of alpha beta but not gamma delta T cells. *Nature* **375**, 795-798  
874 (1995).
- 875
- 876 10. Zhao, B. *et al.* Notch and the pre-TCR coordinate thymocyte proliferation by induction of the SCF  
877 subunits Fbxl1 and Fbxl12. *Nat Immunol* **20**, 1381-1392 (2019).
- 878
- 879 11. Chen, L., Foreman, D.P., Sant'Angelo, D.B. & Krangel, M.S. Yin Yang 1 Promotes Thymocyte  
880 Survival by Downregulating p53. *J Immunol* **196**, 2572-2582 (2016).
- 881
- 882 12. Bouillet, P. *et al.* BH3-only Bcl-2 family member Bim is required for apoptosis of autoreactive  
883 thymocytes. *Nature* **415**, 922-926 (2002).
- 884
- 885 13. Hutcheson, J. & Perlman, H. Loss of Bim results in abnormal accumulation of mature CD4-CD8-  
886 CD44-CD25- thymocytes. *Immunobiology* **212**, 629-636 (2007).
- 887
- 888 14. Villunger, A. *et al.* p53- and drug-induced apoptotic responses mediated by BH3-only proteins  
889 puma and noxa. *Science* **302**, 1036-1038 (2003).
- 890
- 891 15. Ren, D. *et al.* BID, BIM, and PUMA are essential for activation of the BAX- and BAK-dependent  
892 cell death program. *Science* **330**, 1390-1393 (2010).
- 893
- 894 16. Hutcheson, J. *et al.* Combined loss of proapoptotic genes Bak or Bax with Bim synergizes to  
895 cause defects in hematopoiesis and in thymocyte apoptosis. *J Exp Med* **201**, 1949-1960 (2005).
- 896
- 897 17. Rothenberg, E.V. & Taghon, T. Molecular genetics of T cell development. *Annu Rev Immunol* **23**,  
898 601-649 (2005).
- 899
- 900 18. Sawada, S. & Littman, D.R. A heterodimer of HEB and an E12-related protein interacts with the  
901 CD4 enhancer and regulates its activity in T-cell lines. *Mol Cell Biol* **13**, 5620-5628 (1993).
- 902
- 903 19. Belle, I. & Zhuang, Y. E proteins in lymphocyte development and lymphoid diseases. *Curr Top*  
904 *Dev Biol* **110**, 153-187 (2014).
- 905
- 906 20. Hsu, L.Y. *et al.* A conserved transcriptional enhancer regulates RAG gene expression in  
907 developing B cells. *Immunity* **19**, 105-117 (2003).
- 908
- 909 21. Herblot, S., Steff, A.M., Hugo, P., Aplan, P.D. & Hoang, T. SCL and LMO1 alter thymocyte  
910 differentiation: inhibition of E2A-HEB function and pre-T alpha chain expression. *Nat Immunol* **1**,  
911 138-144 (2000).

- 912  
913 22. Jia, J., Dai, M. & Zhuang, Y. E proteins are required to activate germline transcription of the TCR  
914 Vbeta8.2 gene. *Eur J Immunol* **38**, 2806-2820 (2008).
- 915  
916 23. Ghosh, J.K., Romanow, W.J. & Murre, C. Induction of a diverse T cell receptor gamma/delta  
917 repertoire by the helix-loop-helix proteins E2A and HEB in nonlymphoid cells. *J Exp Med* **193**,  
918 769-776 (2001).
- 919  
920 24. Jones, M.E. & Zhuang, Y. Stage-specific functions of E-proteins at the beta-selection and T-cell  
921 receptor checkpoints during thymocyte development. *Immunol Res* **49**, 202-215 (2011).
- 922  
923 25. Engel, I., Johns, C., Bain, G., Rivera, R.R. & Murre, C. Early thymocyte development is regulated  
924 by modulation of E2A protein activity. *J Exp Med* **194**, 733-745 (2001).
- 925  
926 26. Xu, W. *et al.* E2A transcription factors limit expression of Gata3 to facilitate T lymphocyte  
927 lineage commitment. *Blood* **121**, 1534-1542 (2013).
- 928  
929 27. Jones, M.E. & Zhuang, Y. Acquisition of a functional T cell receptor during T lymphocyte  
930 development is enforced by HEB and E2A transcription factors. *Immunity* **27**, 860-870 (2007).
- 931  
932 28. Kato, K., Omura, H., Ishitani, R. & Nureki, O. Cyclic GMP-AMP as an Endogenous Second  
933 Messenger in Innate Immune Signaling by Cytosolic DNA. *Annu Rev Biochem* **86**, 541-566 (2017).
- 934  
935 29. Sun, L., Wu, J., Du, F., Chen, X. & Chen, Z.J. Cyclic GMP-AMP synthase is a cytosolic DNA sensor  
936 that activates the type I interferon pathway. *Science* **339**, 786-791 (2013).
- 937  
938 30. Cerboni, S. *et al.* Intrinsic antiproliferative activity of the innate sensor STING in T lymphocytes. *J*  
939 *Exp Med* **214**, 1769-1785 (2017).
- 940  
941 31. Gulen, M.F. *et al.* Signalling strength determines proapoptotic functions of STING. *Nat Commun*  
942 **8**, 427 (2017).
- 943  
944 32. Li, W. *et al.* cGAS-STING-mediated DNA sensing maintains CD8(+) T cell stemness and promotes  
945 antitumor T cell therapy. *Sci Transl Med* **12** (2020).
- 946  
947 33. Wu, J., Dobbs, N., Yang, K. & Yan, N. Interferon-Independent Activities of Mammalian STING  
948 Mediate Antiviral Response and Tumor Immune Evasion. *Immunity* **53**, 115-126 e115 (2020).
- 949  
950 34. Yang, Y.J. *et al.* Microcephaly gene links trithorax and REST/NRSF to control neural stem cell  
951 proliferation and differentiation. *Cell* **151**, 1097-1112 (2012).

- 952  
953 35. Park, J.H. *et al.* Signaling by intrathymic cytokines, not T cell antigen receptors, specifies CD8  
954 lineage choice and promotes the differentiation of cytotoxic-lineage T cells. *Nat Immunol* **11**,  
955 257-264 (2010).
- 956  
957 36. Guey, B. *et al.* BAF restricts cGAS on nuclear DNA to prevent innate immune activation. *Science*  
958 **369**, 823-828 (2020).
- 959  
960 37. Engel, I. & Murre, C. The function of E- and Id proteins in lymphocyte development. *Nat Rev*  
961 *Immunol* **1**, 193-199 (2001).
- 962  
963 38. Engel, I. & Murre, C. E2A proteins enforce a proliferation checkpoint in developing thymocytes.  
964 *EMBO J* **23**, 202-211 (2004).
- 965  
966 39. Jones-Mason, M.E. *et al.* E protein transcription factors are required for the development of  
967 CD4(+) lineage T cells. *Immunity* **36**, 348-361 (2012).
- 968  
969 40. Roy, S. *et al.* Id Proteins Suppress E2A-Driven Invariant Natural Killer T Cell Development prior to  
970 TCR Selection. *Front Immunol* **9**, 42 (2018).
- 971  
972 41. Dashtsoodol, N. *et al.* Alternative pathway for the development of Valpha14(+) NKT cells directly  
973 from CD4(-)CD8(-) thymocytes that bypasses the CD4(+)CD8(+) stage. *Nat Immunol* **18**, 274-282  
974 (2017).
- 975  
976 42. Han, B.Y. *et al.* Zinc finger protein Zfp335 is required for the formation of the naive T cell  
977 compartment. *Elife* **3** (2014).
- 978  
979 43. Haks, M.C., Krimpenfort, P., van den Brakel, J.H. & Kruisbeek, A.M. Pre-TCR signaling and  
980 inactivation of p53 induces crucial cell survival pathways in pre-T cells. *Immunity* **11**, 91-101  
981 (1999).
- 982  
983 44. Taghon, T., Yui, M.A., Pant, R., Diamond, R.A. & Rothenberg, E.V. Developmental and molecular  
984 characterization of emerging beta- and gammadelta-selected pre-T cells in the adult mouse  
985 thymus. *Immunity* **24**, 53-64 (2006).
- 986  
987 45. Holmes, R. & Zuniga-Pflucker, J.C. The OP9-DL1 system: generation of T-lymphocytes from  
988 embryonic or hematopoietic stem cells in vitro. *Cold Spring Harb Protoc* **2009**, pdb prot5156  
989 (2009).
- 990  
991 46. Mingueneau, M. *et al.* The transcriptional landscape of alphabeta T cell differentiation. *Nat*  
992 *Immunol* **14**, 619-632 (2013).

- 993  
994 47. Miller, D.G., Adam, M.A. & Miller, A.D. Gene transfer by retrovirus vectors occurs only in cells  
995 that are actively replicating at the time of infection. *Mol Cell Biol* **10**, 4239-4242 (1990).
- 996  
997 48. Trang, N.V. *et al.* Determination of cut-off cycle threshold values in routine RT-PCR assays to  
998 assist differential diagnosis of norovirus in children hospitalized for acute gastroenteritis.  
999 *Epidemiol Infect* **143**, 3292-3299 (2015).
- 1000  
1001 49. Asencio, C. *et al.* Coordination of kinase and phosphatase activities by Lem4 enables nuclear  
1002 envelope reassembly during mitosis. *Cell* **150**, 122-135 (2012).
- 1003  
1004 50. Carleton, M. *et al.* Signals transduced by CD3epsilon, but not by surface pre-TCR complexes, are  
1005 able to induce maturation of an early thymic lymphoma in vitro. *J Immunol* **163**, 2576-2585  
1006 (1999).
- 1007  
1008 51. Tanenbaum, M.E., Gilbert, L.A., Qi, L.S., Weissman, J.S. & Vale, R.D. A protein-tagging system for  
1009 signal amplification in gene expression and fluorescence imaging. *Cell* **159**, 635-646 (2014).
- 1010  
1011 52. Ma, H. *et al.* Barrier-to-Autointegration Factor 1 Protects against a Basal cGAS-STING Response.  
1012 *mBio* **11** (2020).
- 1013  
1014 53. Larkin, B. *et al.* Cutting Edge: Activation of STING in T Cells Induces Type I IFN Responses and Cell  
1015 Death. *J Immunol* **199**, 397-402 (2017).
- 1016  
1017 54. Zierhut, C. & Funabiki, H. Regulation and Consequences of cGAS Activation by Self-DNA. *Trends*  
1018 *Cell Biol* **30**, 594-605 (2020).
- 1019  
1020 55. McArthur, K. *et al.* BAK/BAX macropores facilitate mitochondrial herniation and mtDNA efflux  
1021 during apoptosis. *Science* **359** (2018).
- 1022  
1023 56. Vincent, J. *et al.* Small molecule inhibition of cGAS reduces interferon expression in primary  
1024 macrophages from autoimmune mice. *Nat Commun* **8**, 750 (2017).
- 1025  
1026 57. Haag, S.M. *et al.* Targeting STING with covalent small-molecule inhibitors. *Nature* **559**, 269-273  
1027 (2018).
- 1028  
1029 58. Zhang, B. *et al.* Differential Requirements of TCR Signaling in Homeostatic Maintenance and  
1030 Function of Dendritic Epidermal T Cells. *J Immunol* **195**, 4282-4291 (2015).
- 1031  
1032 59. Lucas, B. & Germain, R.N. Unexpectedly complex regulation of CD4/CD8 coreceptor expression  
1033 supports a revised model for CD4+CD8+ thymocyte differentiation. *Immunity* **5**, 461-477 (1996).

- 1034  
1035 60. Agata, Y. *et al.* Regulation of T cell receptor beta gene rearrangements and allelic exclusion by  
1036 the helix-loop-helix protein, E47. *Immunity* **27**, 871-884 (2007).
- 1037  
1038 61. Petersson, K., Ivars, F. & Sigvardsson, M. The pT alpha promoter and enhancer are direct targets  
1039 for transactivation by E box-binding proteins. *Eur J Immunol* **32**, 911-920 (2002).
- 1040  
1041 62. Wang, D. *et al.* The basic helix-loop-helix transcription factor HEBAIt is expressed in pro-T cells  
1042 and enhances the generation of T cell precursors. *J Immunol* **177**, 109-119 (2006).
- 1043  
1044 63. Link, N. *et al.* Mutations in ANKLE2, a ZIKA Virus Target, Disrupt an Asymmetric Cell Division  
1045 Pathway in Drosophila Neuroblasts to Cause Microcephaly. *Dev Cell* **51**, 713-729 e716 (2019).
- 1046  
1047 64. Yamamoto, S. *et al.* A drosophila genetic resource of mutants to study mechanisms underlying  
1048 human genetic diseases. *Cell* **159**, 200-214 (2014).
- 1049  
1050 65. Matsui, T.K. & Mori, E. Microglia support neural stem cell maintenance and growth. *Biochem*  
1051 *Biophys Res Commun* **503**, 1880-1884 (2018).
- 1052  
1053 66. Shigemoto-Mogami, Y., Hoshikawa, K., Goldman, J.E., Sekino, Y. & Sato, K. Microglia enhance  
1054 neurogenesis and oligodendrogenesis in the early postnatal subventricular zone. *J Neurosci* **34**,  
1055 2231-2243 (2014).
- 1056  
1057 67. Ribeiro Xavier, A.L., Kress, B.T., Goldman, S.A., Lacerda de Menezes, J.R. & Nedergaard, M. A  
1058 Distinct Population of Microglia Supports Adult Neurogenesis in the Subventricular Zone. *J*  
1059 *Neurosci* **35**, 11848-11861 (2015).
- 1060  
1061 68. Reinert, L.S. *et al.* Brain immune cells undergo cGAS/STING-dependent apoptosis during herpes  
1062 simplex virus type 1 infection to limit type I IFN production. *J Clin Invest* **131** (2021).
- 1063  
1064 69. Yang, K. *et al.* Metabolic signaling directs the reciprocal lineage decisions of alphabeta and  
1065 gammadelta T cells. *Sci Immunol* **3** (2018).
- 1066  
1067 70. Sanson, K.R. *et al.* Optimized libraries for CRISPR-Cas9 genetic screens with multiple modalities.  
1068 *Nat Commun* **9**, 5416 (2018).
- 1069  
1070
